# Supplementary material
Source: PubMed Central journal article supplement (PMC6174029)
Supplement: NIHMS989496-supplement-Figure_S1.pdf [file NIHMS989496-supplement-Figure_S1.pdf]

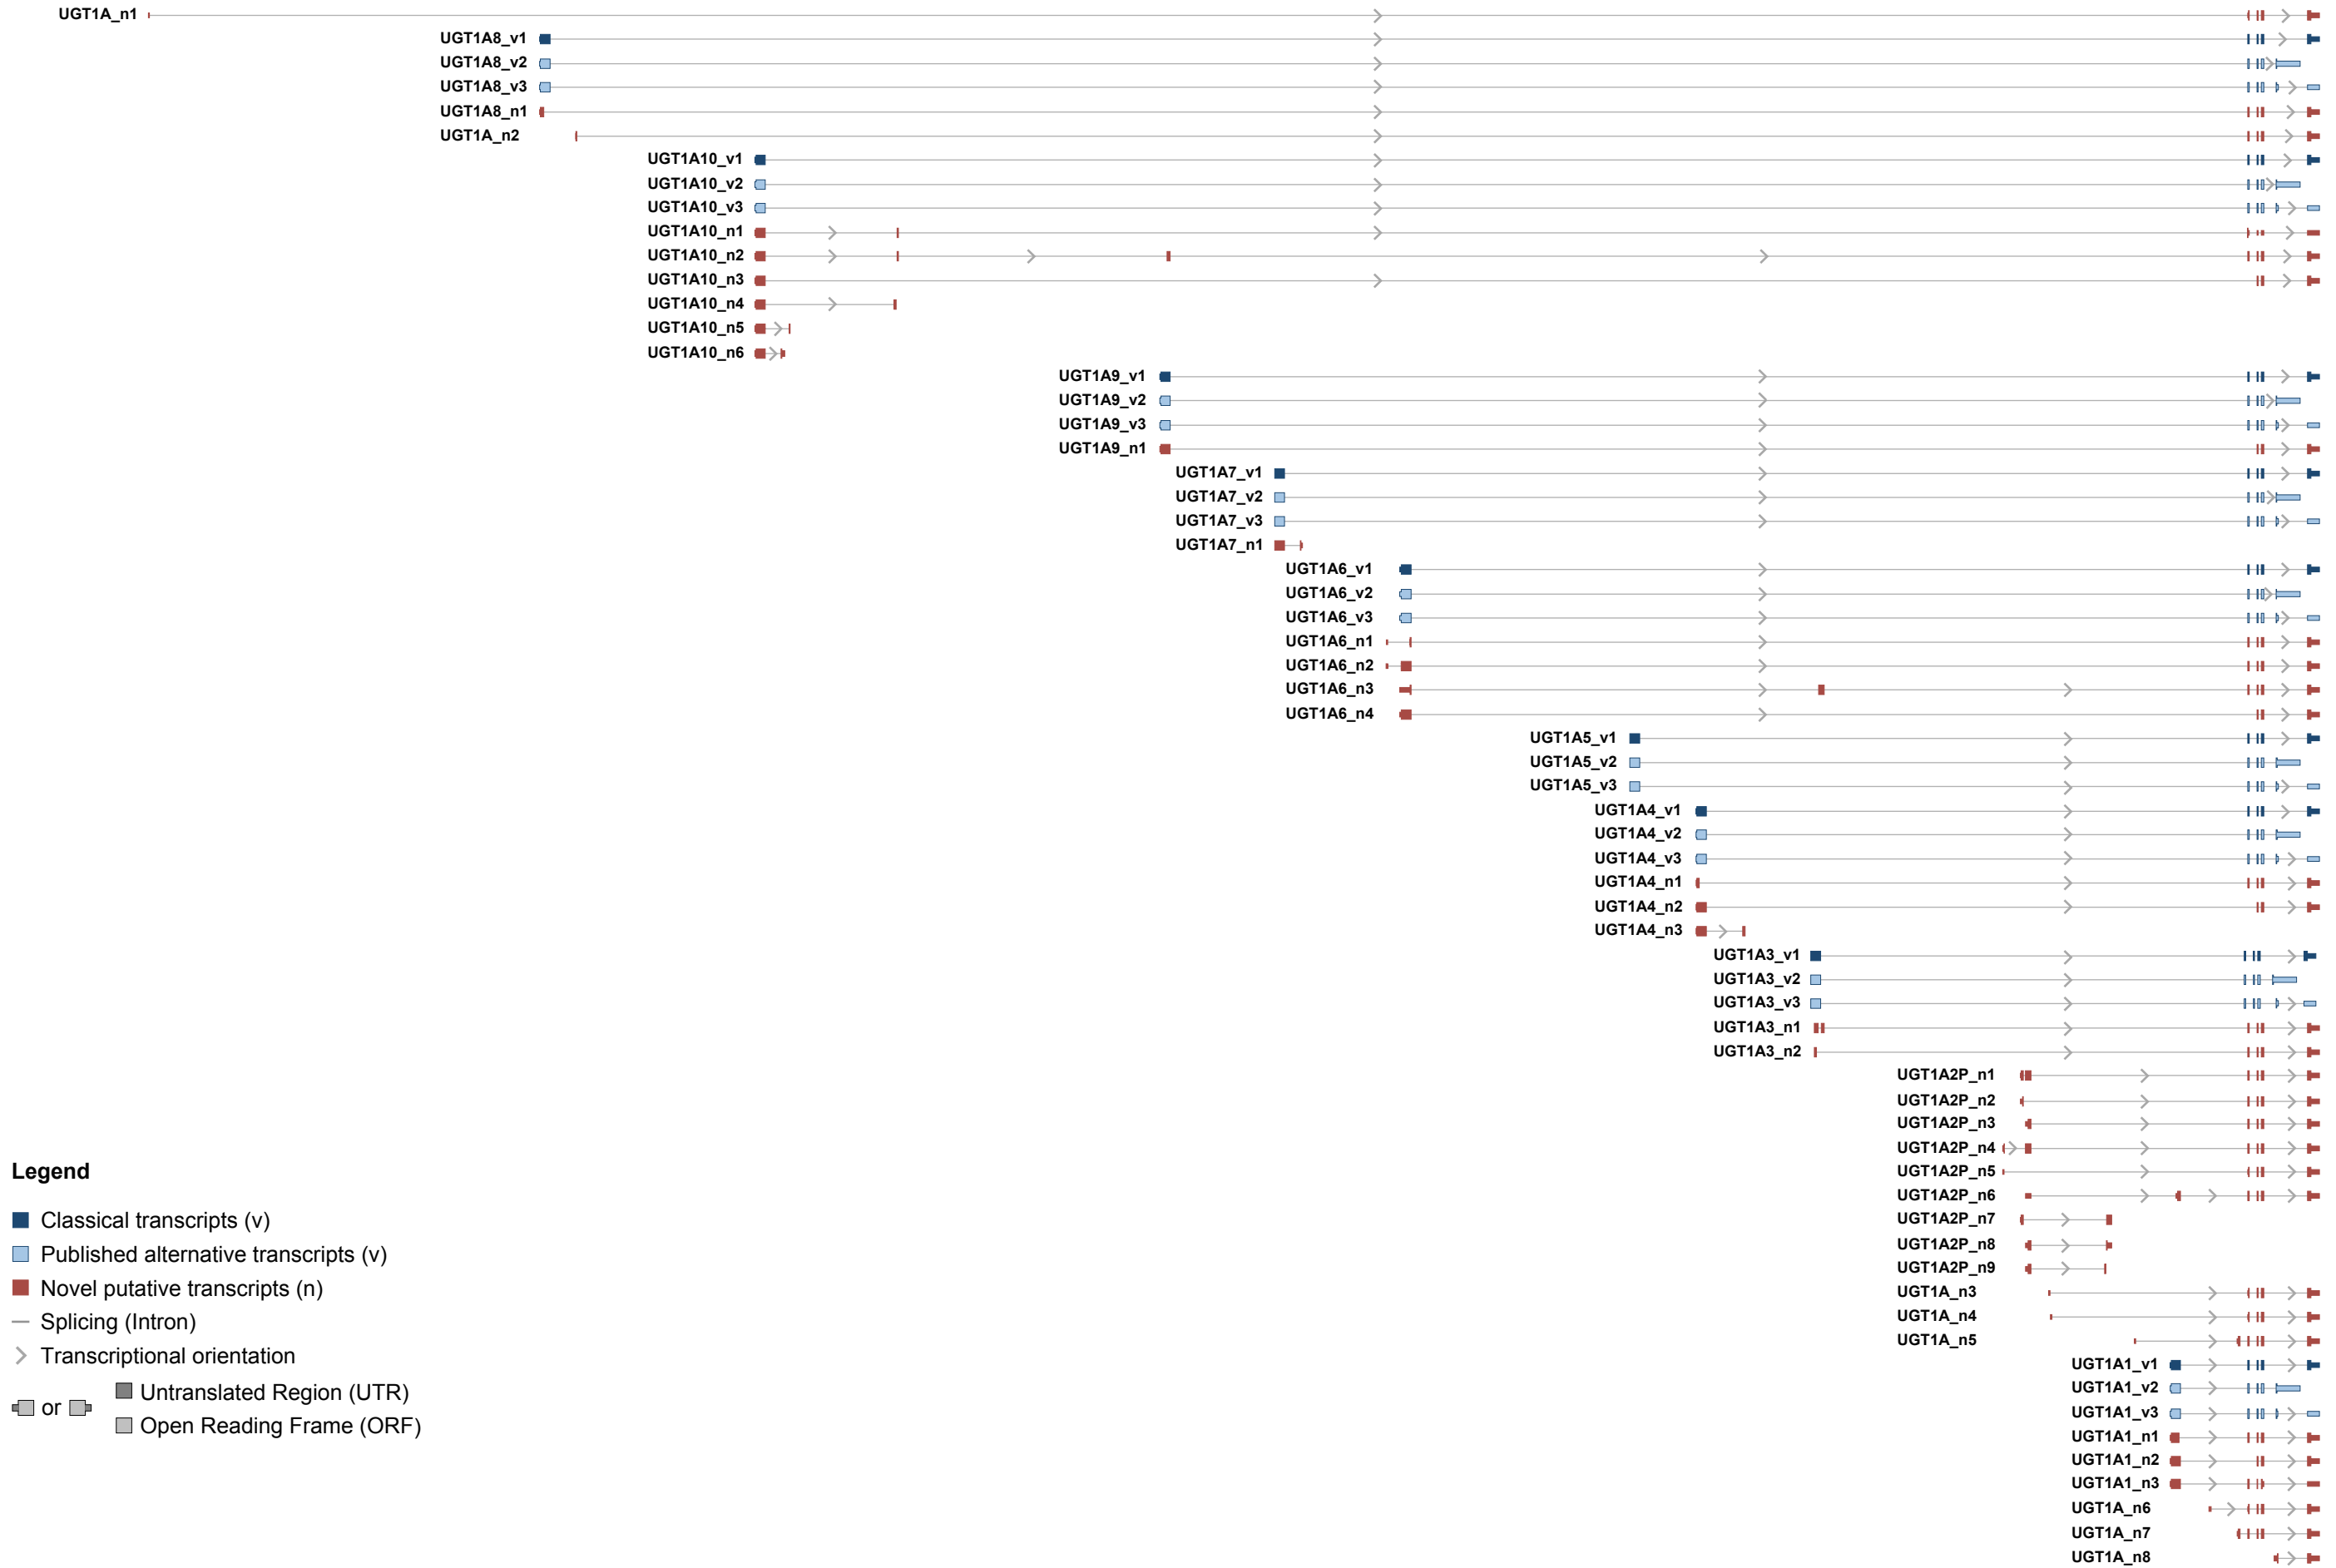

**Legend**

- Classical transcripts (v)
- Published alternative transcripts (v)
- Novel putative transcripts (n)
- Splicing (Intron)
- > Transcriptional orientation
- or ■ Untranslated Region (UTR)
- Open Reading Frame (ORF)

***UGT1A8***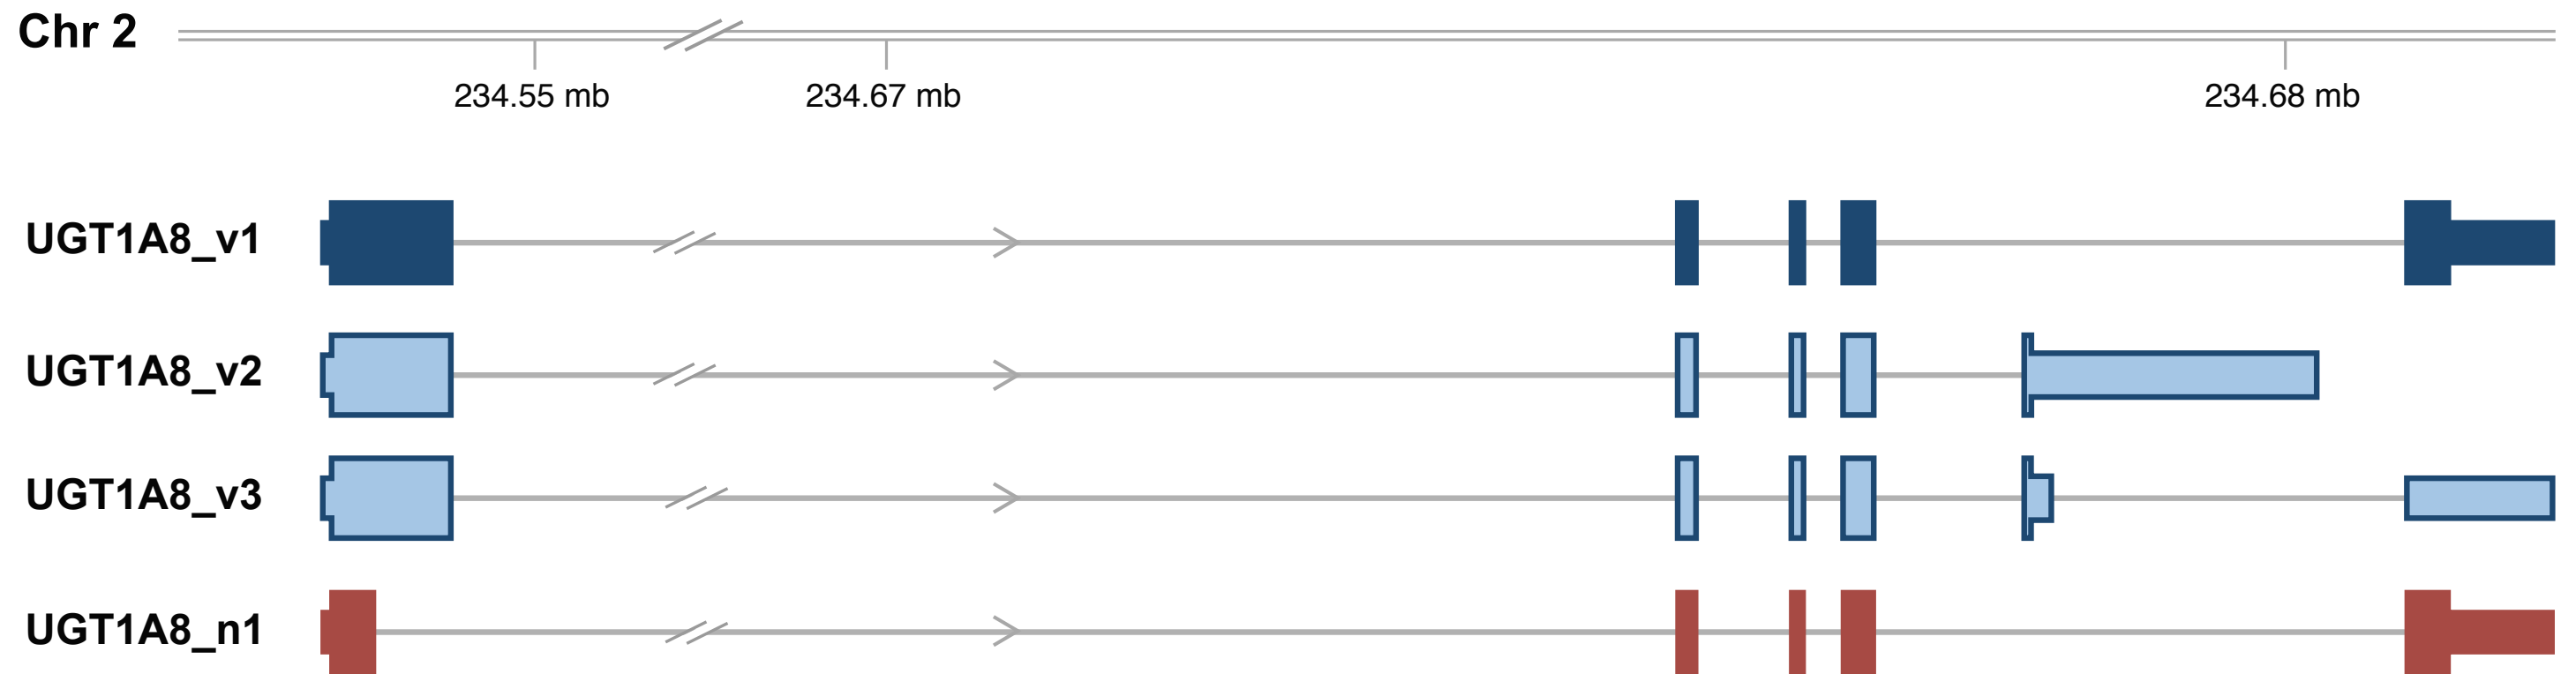**Legend**

- Classical transcripts (v)
- Published alternative transcripts (v)
- Novel putative transcripts (n)
- Splicing (Intron)
- > Transcriptional orientation
- or ■ Untranslated Region (UTR)
- Open Reading Frame (ORF)

**UGT1A10**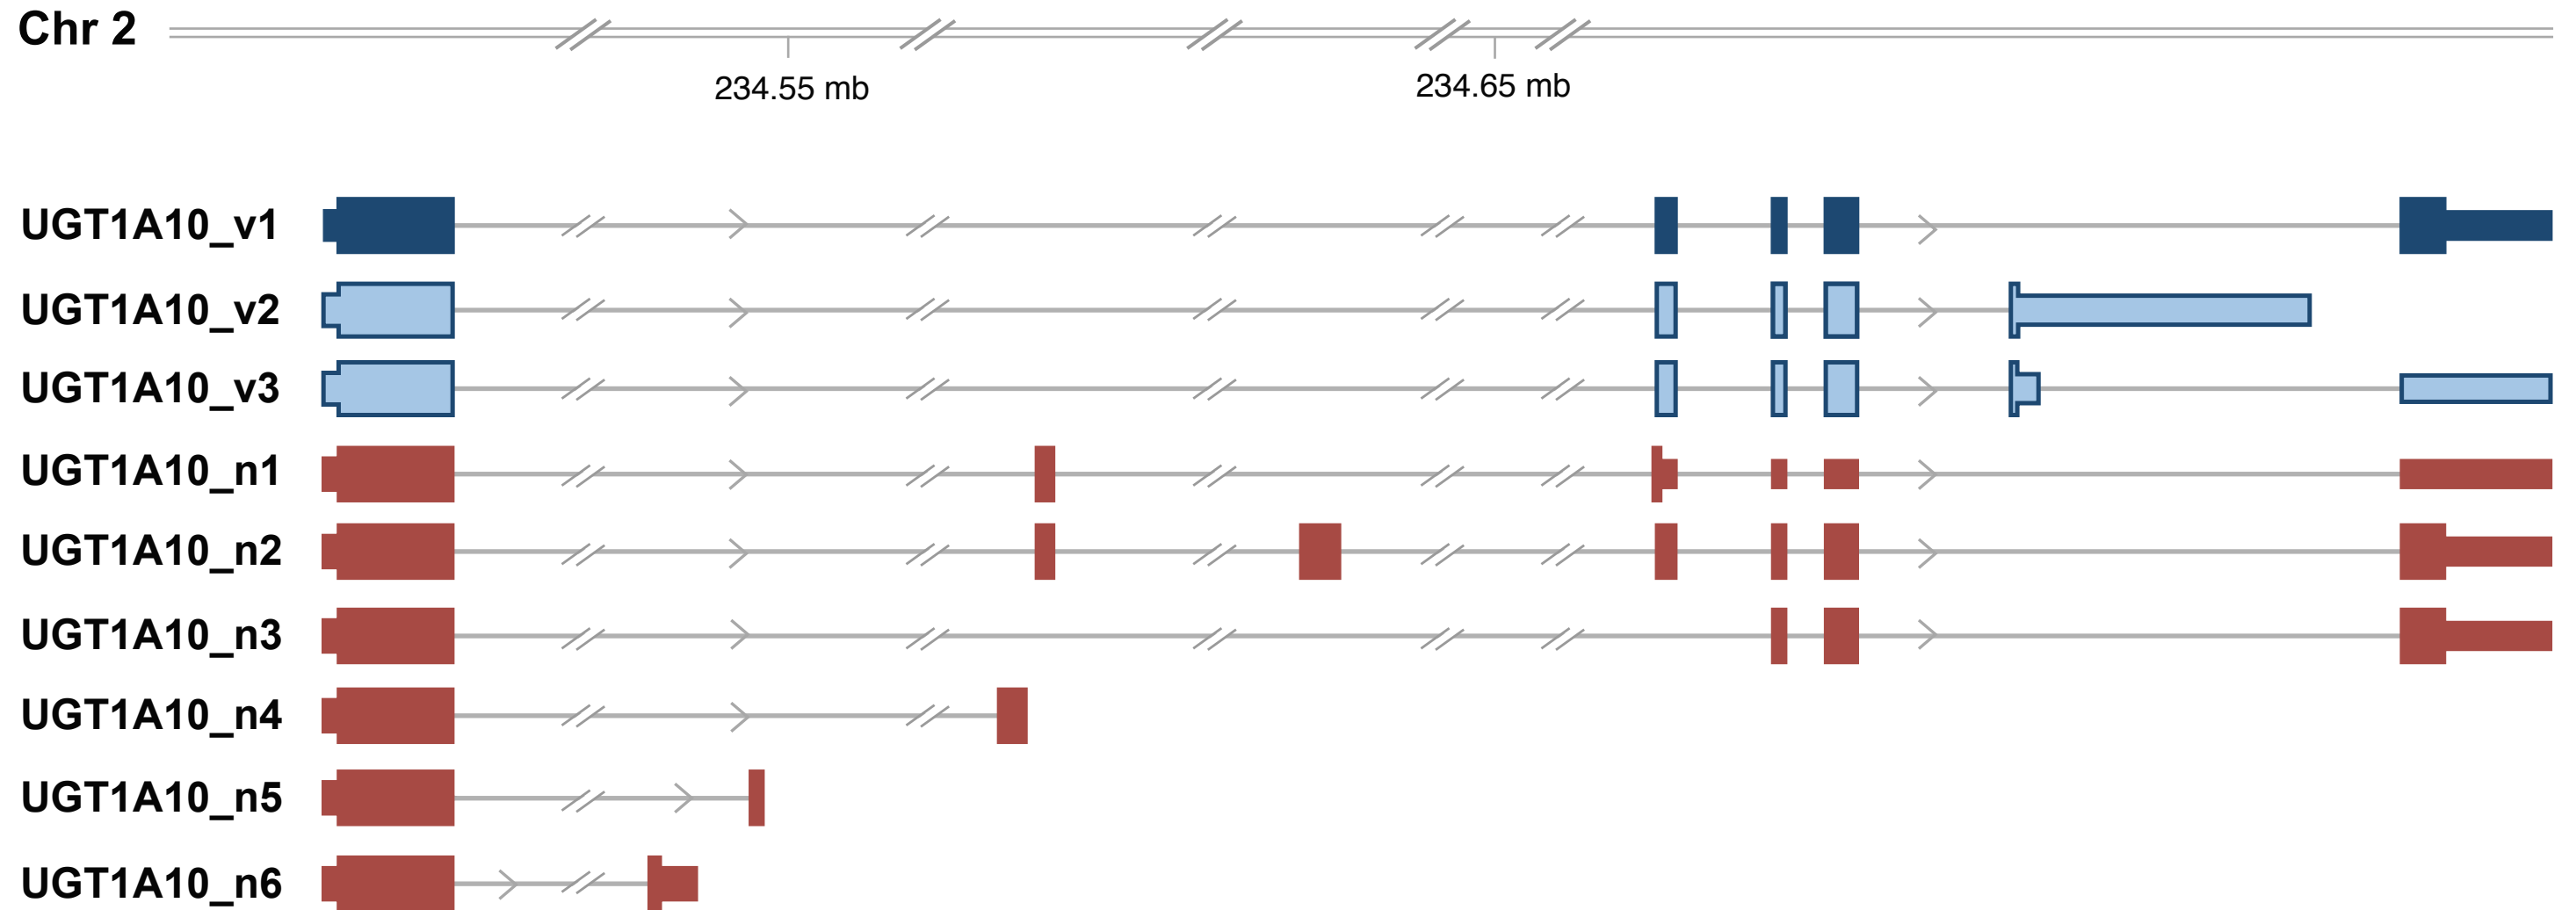**Legend**

- Classical transcripts (v)
- Published alternative transcripts (v)
- Novel putative transcripts (n)
- Splicing (Intron)
- > Transcriptional orientation
- or ■ Untranslated Region (UTR)
- Open Reading Frame (ORF)

***UGT1A9***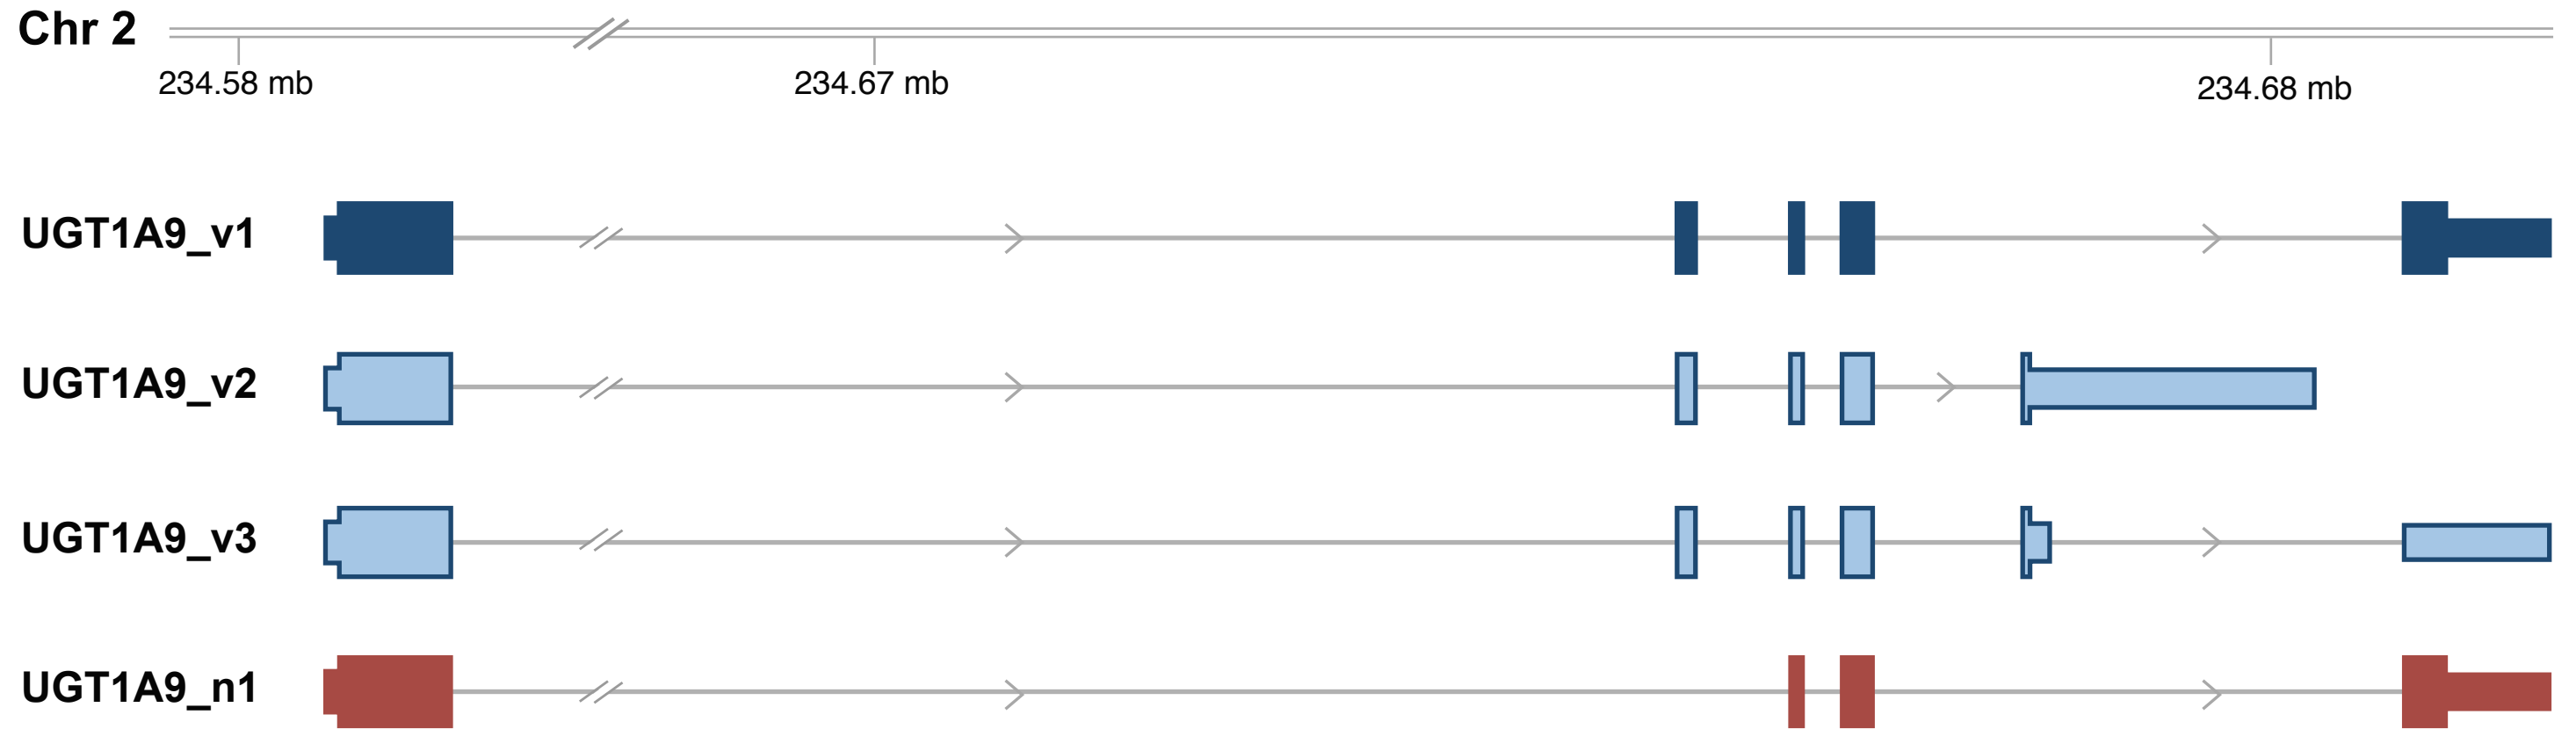**Legend**

- Classical transcripts (v)
- Published alternative transcripts (v)
- Novel putative transcripts (n)
- Splicing (Intron)
- > Transcriptional orientation
- or ■ Untranslated Region (UTR)
- Open Reading Frame (ORF)

S1e

# UGT1A7

Chr 2

234.6 mb

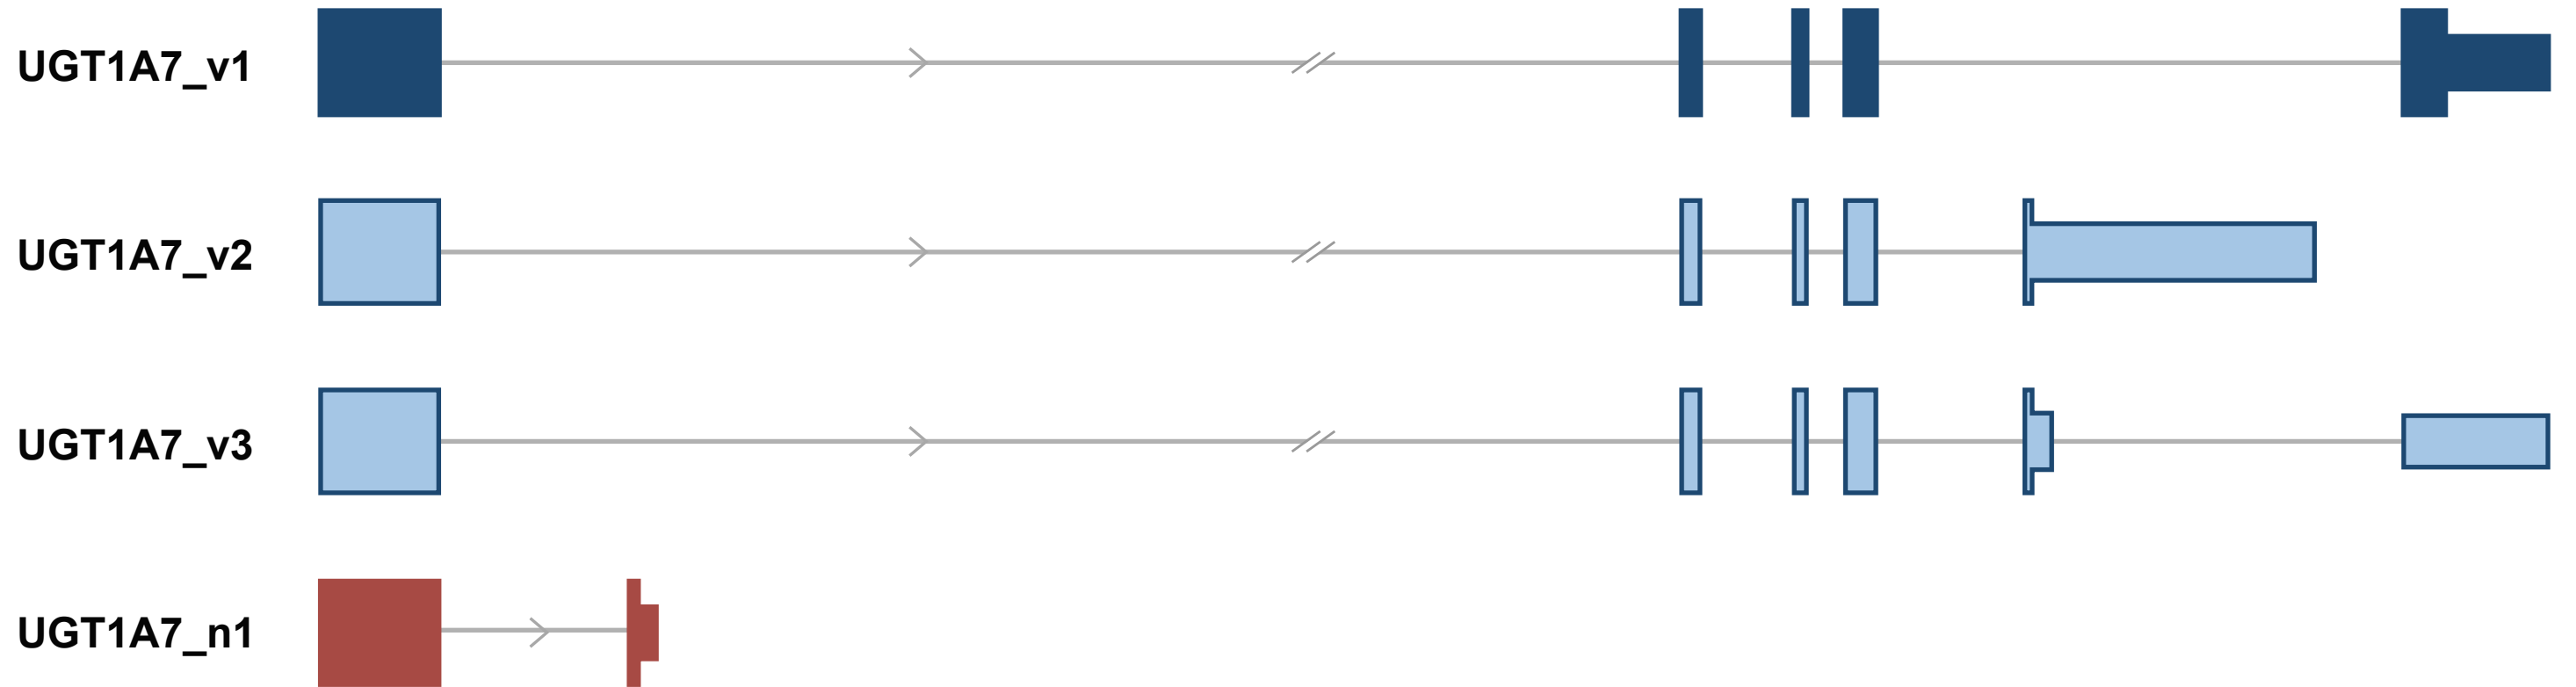

## Legend

- Classical transcripts (v)
- Published alternative transcripts (v)
- Novel putative transcripts (n)
- Splicing (Intron)
- > Transcriptional orientation
- or ■ Untranslated Region (UTR)
- Open Reading Frame (ORF)

***UGT1A6***

Chr 2

234.67 mb

234.68 mb

UGT1A6\_v1

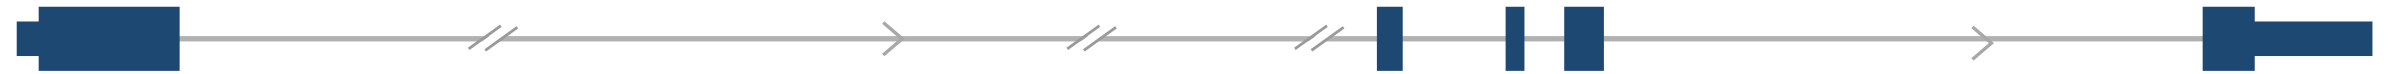

UGT1A6\_v2

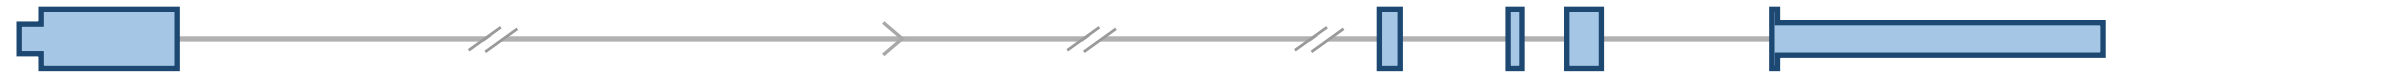

UGT1A6\_v3

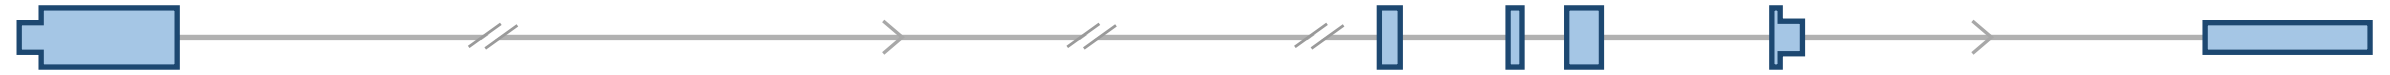

UGT1A6\_n1

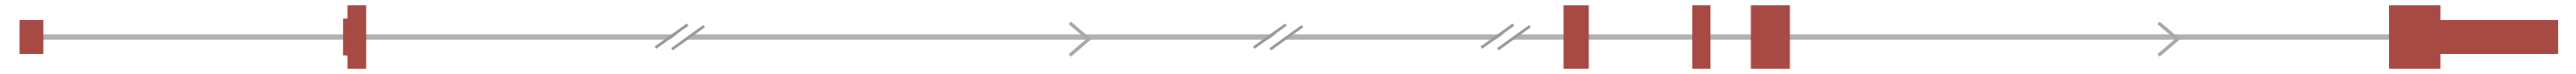

UGT1A6\_n2

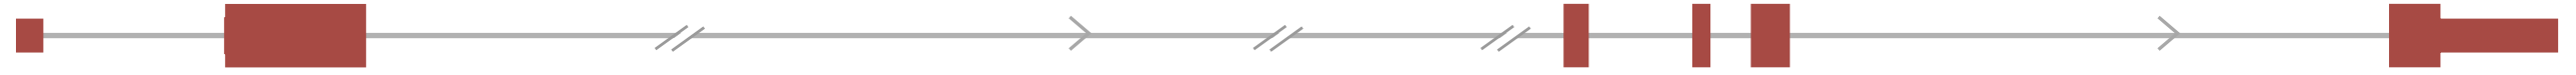

UGT1A6\_n3

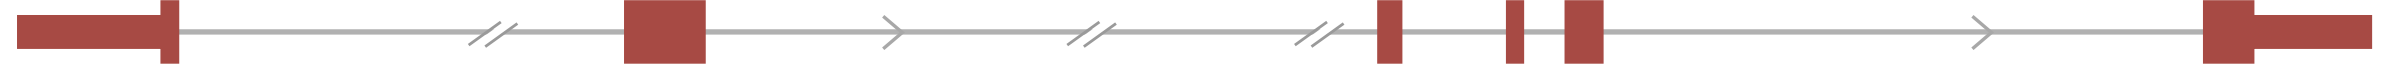

UGT1A6\_n4

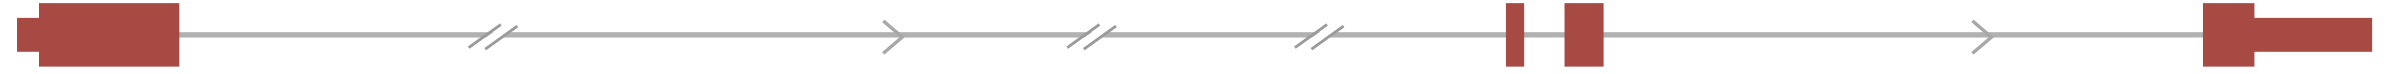**Legend**

- Classical transcripts (v)
- Published alternative transcripts (v)
- Novel putative transcripts (n)
- Splicing (Intron)
- > Transcriptional orientation
- or ■ Untranslated Region (UTR)
- Open Reading Frame (ORF)

S1g

# UGT1A5

Chr 2

234.65 mb

UGT1A5\_v1

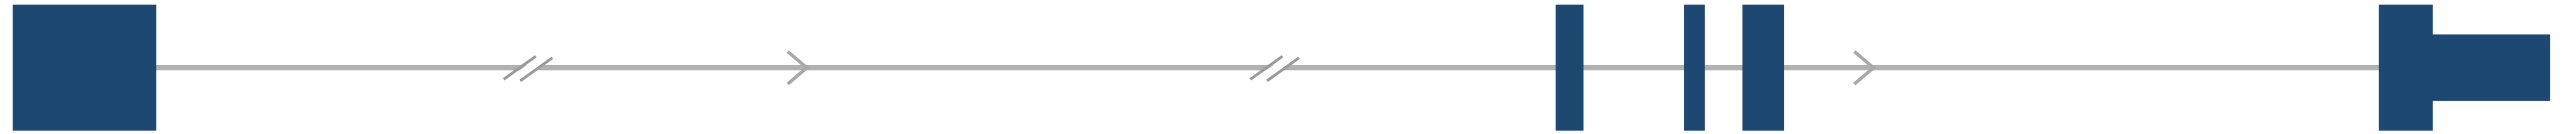

UGT1A5\_v2

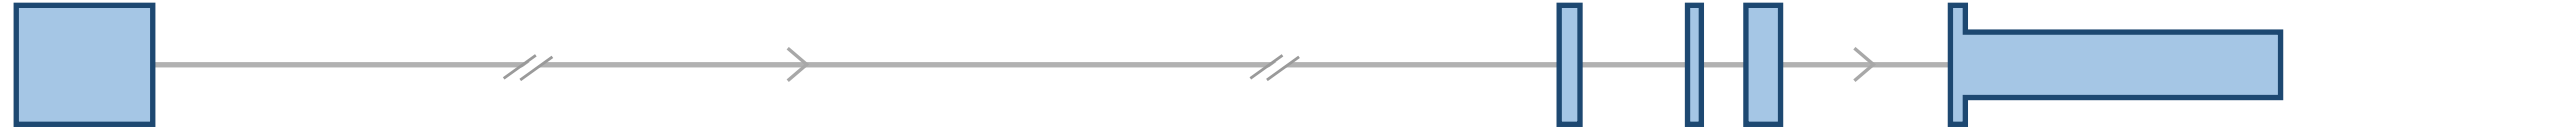

UGT1A5\_v3

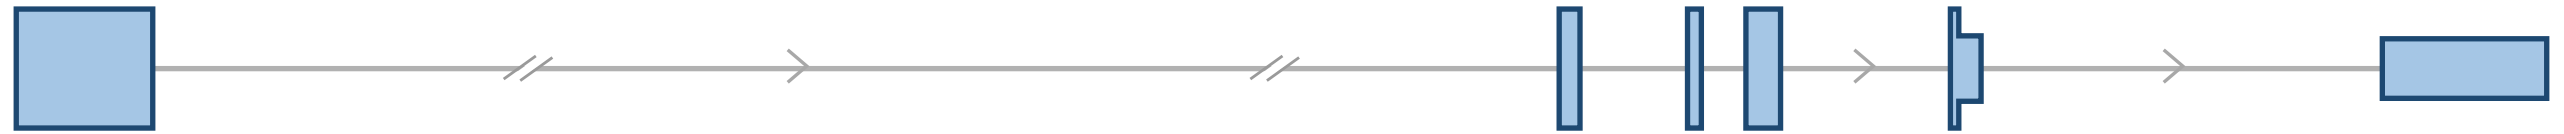

## Legend

- Classical transcripts (v)
- Published alternative transcripts (v)
- Novel putative transcripts (n)
- Splicing (Intron)
- > Transcriptional orientation
- or ■ Untranslated Region (UTR)
- Open Reading Frame (ORF)

# UGT1A4

Chr 2

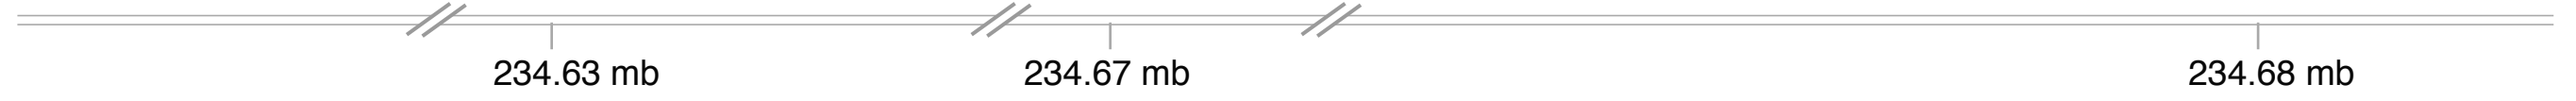

UGT1A4\_v1

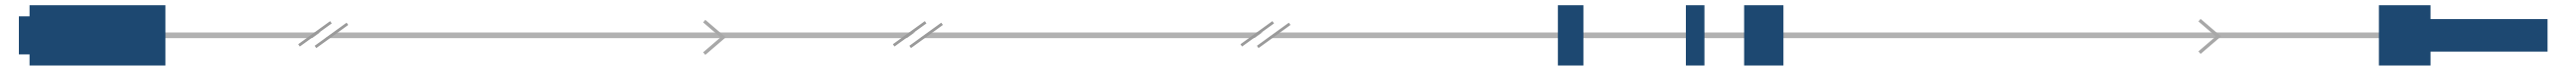

UGT1A4\_v2

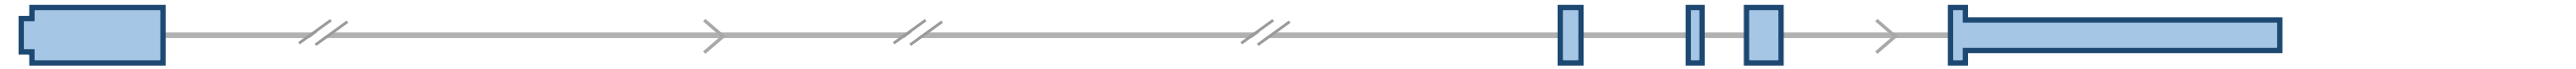

UGT1A4\_v3

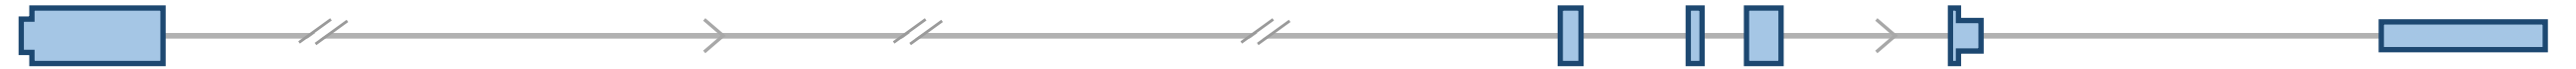

UGT1A4\_n1

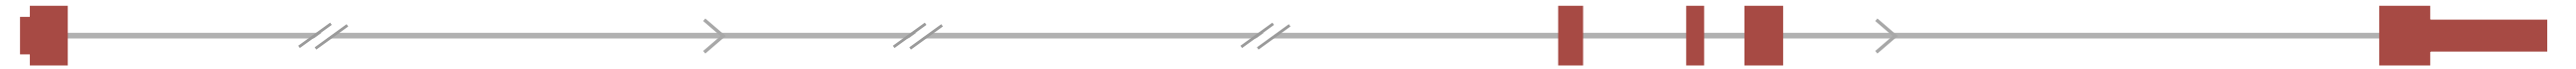

UGT1A4\_n2

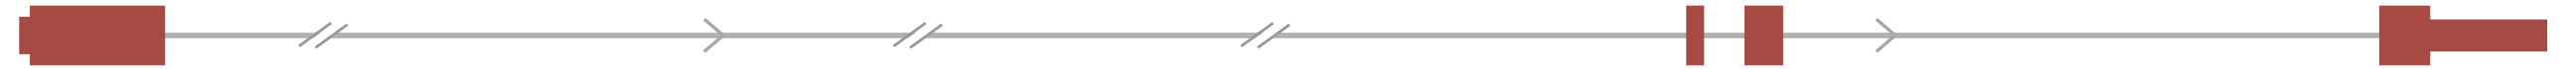

UGT1A4\_n3

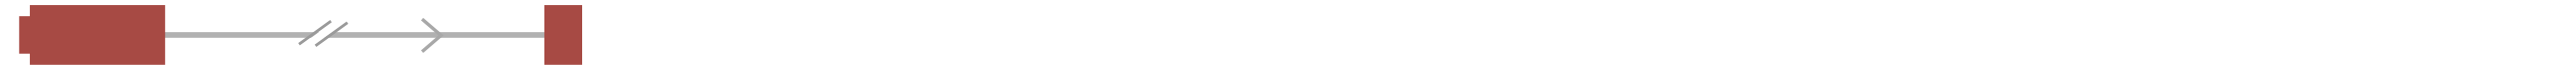

**Legend**

- Classical transcripts (v)
- Published alternative transcripts (v)
- Novel putative transcripts (n)
- Splicing (Intron)
- > Transcriptional orientation
- Untranslated Region (UTR)
- or ■ Open Reading Frame (ORF)



**UGT1A3**

Chr 2

234.65 mb

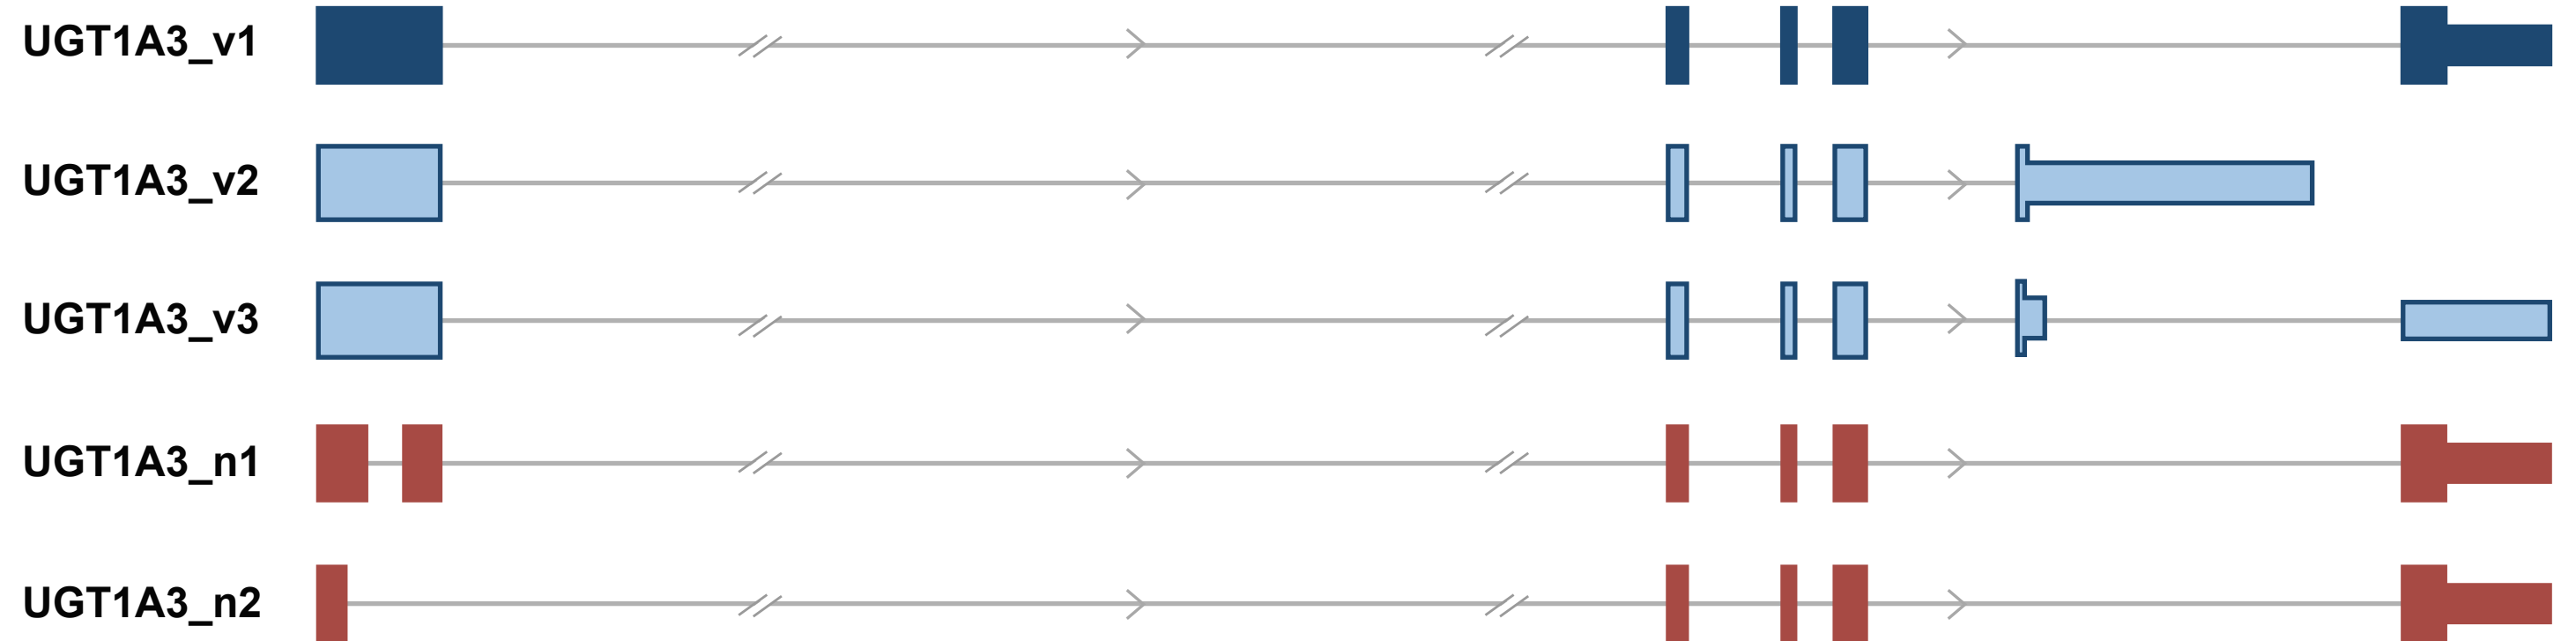**Legend**

- Classical transcripts (v)
- Published alternative transcripts (v)
- Novel putative transcripts (n)
- Splicing (Intron)
- > Transcriptional orientation
- or ■ Untranslated Region (UTR)
- Open Reading Frame (ORF)

***UGT1A2P***

Chr 2

234.66 mb

234.67 mb

234.68 mb

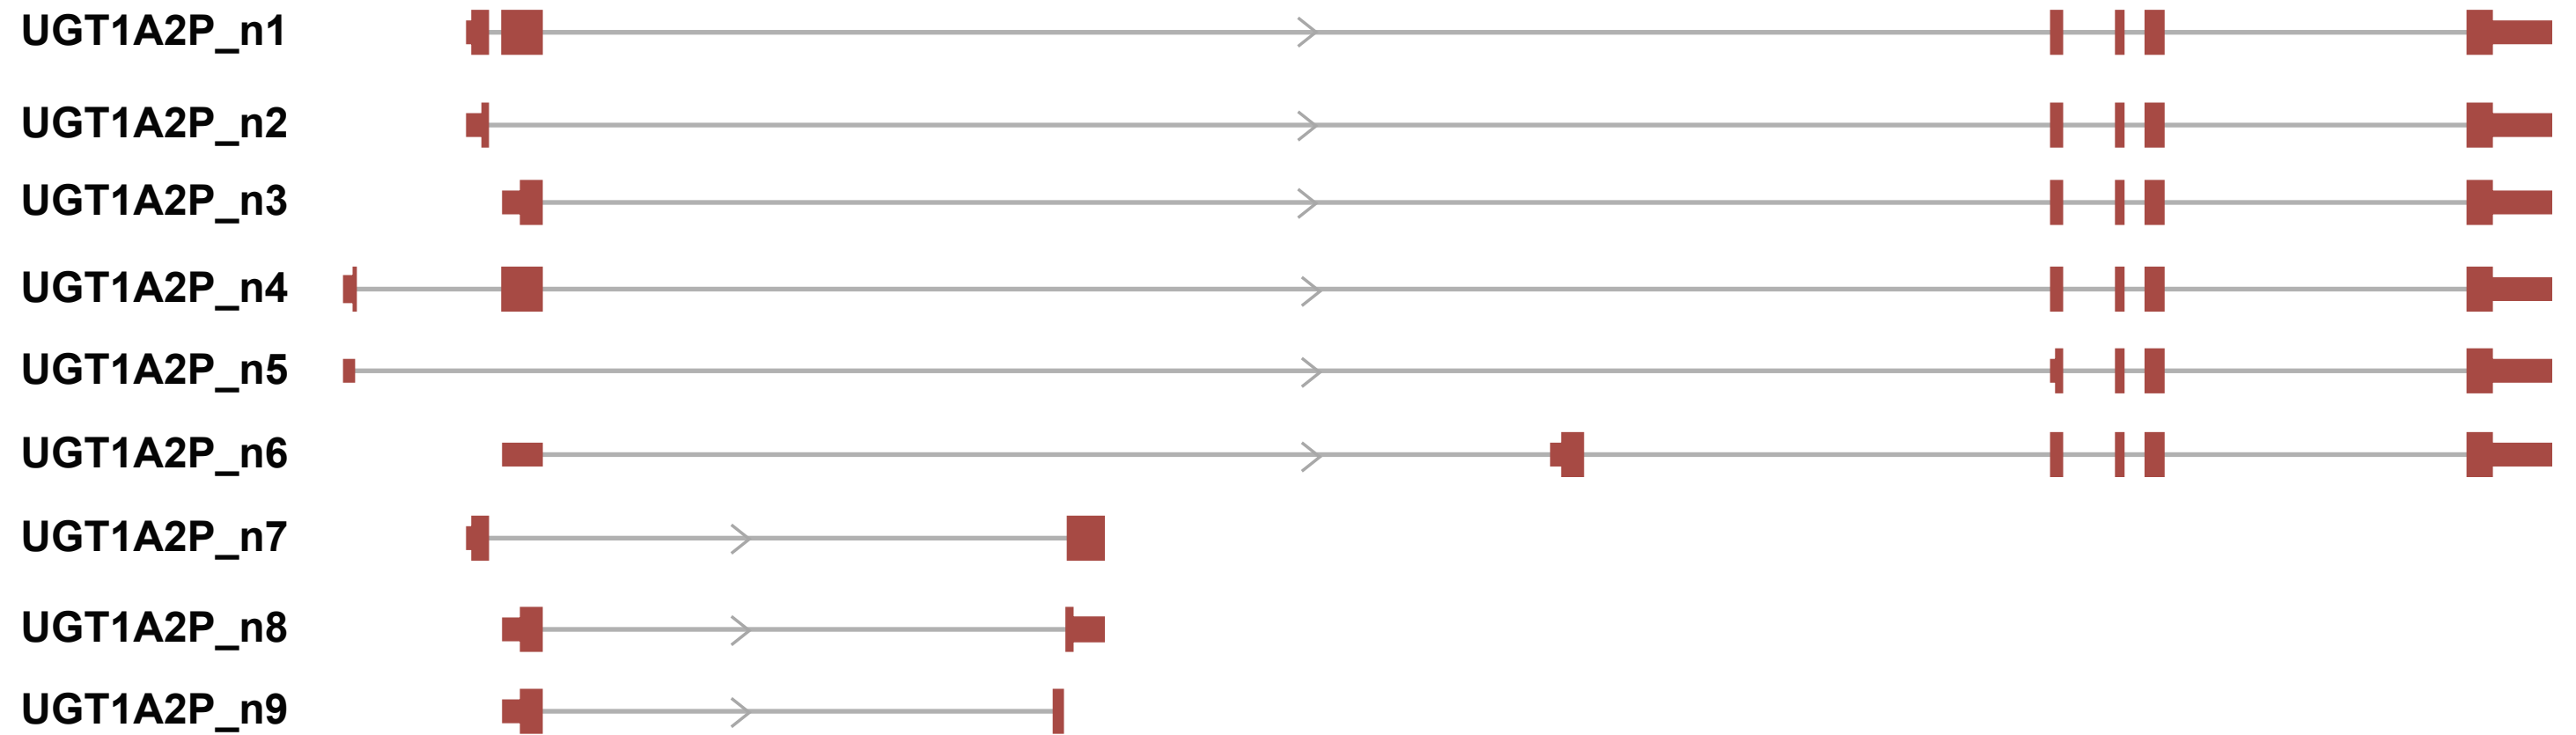**Legend**

- Classical transcripts (v)
- Published alternative transcripts (v)
- Novel putative transcripts (n)
- Splicing (Intron)
- > Transcriptional orientation
- or ■ Untranslated Region (UTR)
- Open Reading Frame (ORF)

**UGT1A1**

Chr 2

234.67 mb

234.68 mb

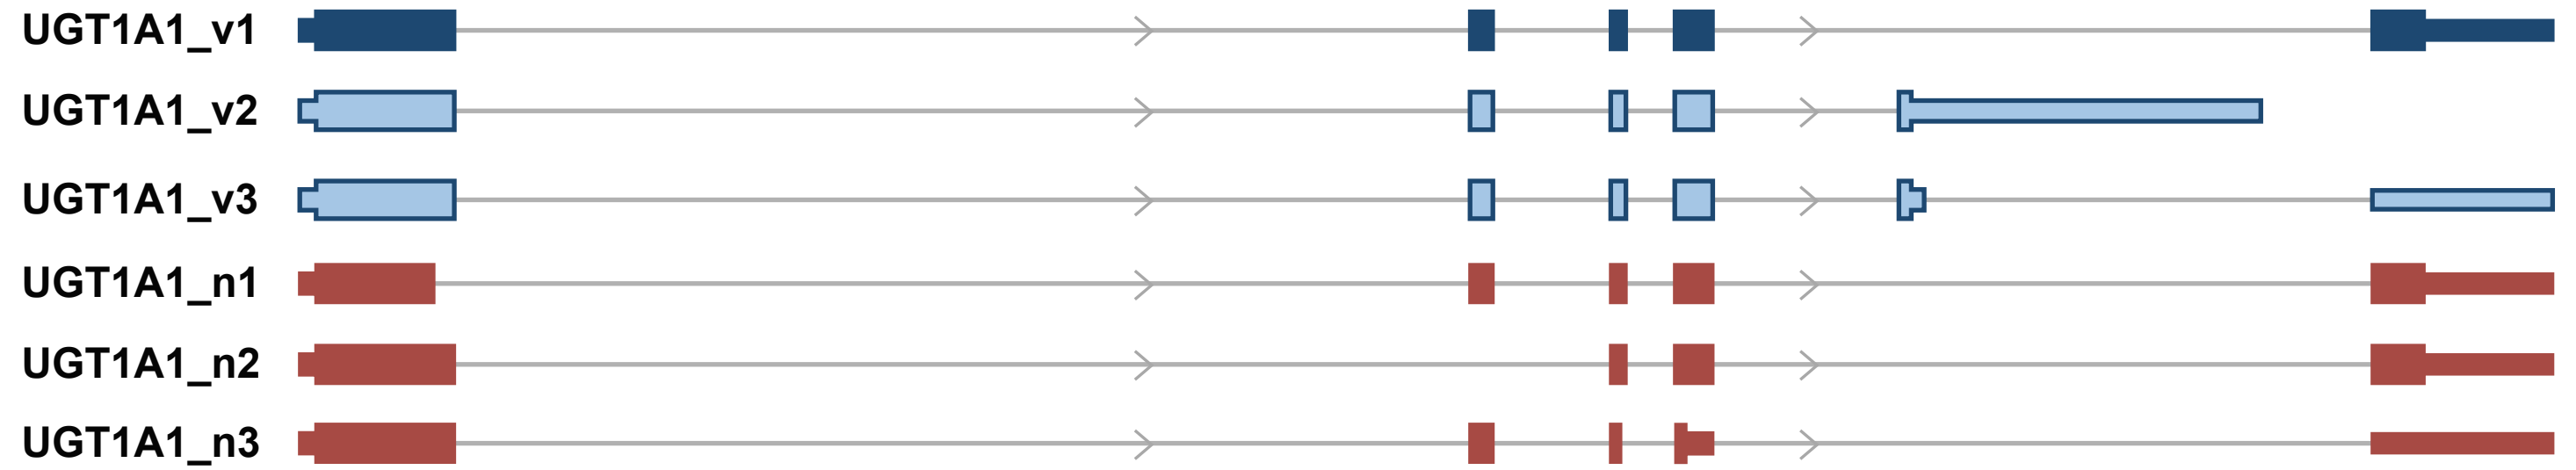**Legend**

- Classical transcripts (v)
- Published alternative transcripts (v)
- Novel putative transcripts (n)
- Splicing (Intron)
- > Transcriptional orientation
- or ■ Untranslated Region (UTR)
- Open Reading Frame (ORF)

***Other UGT1A***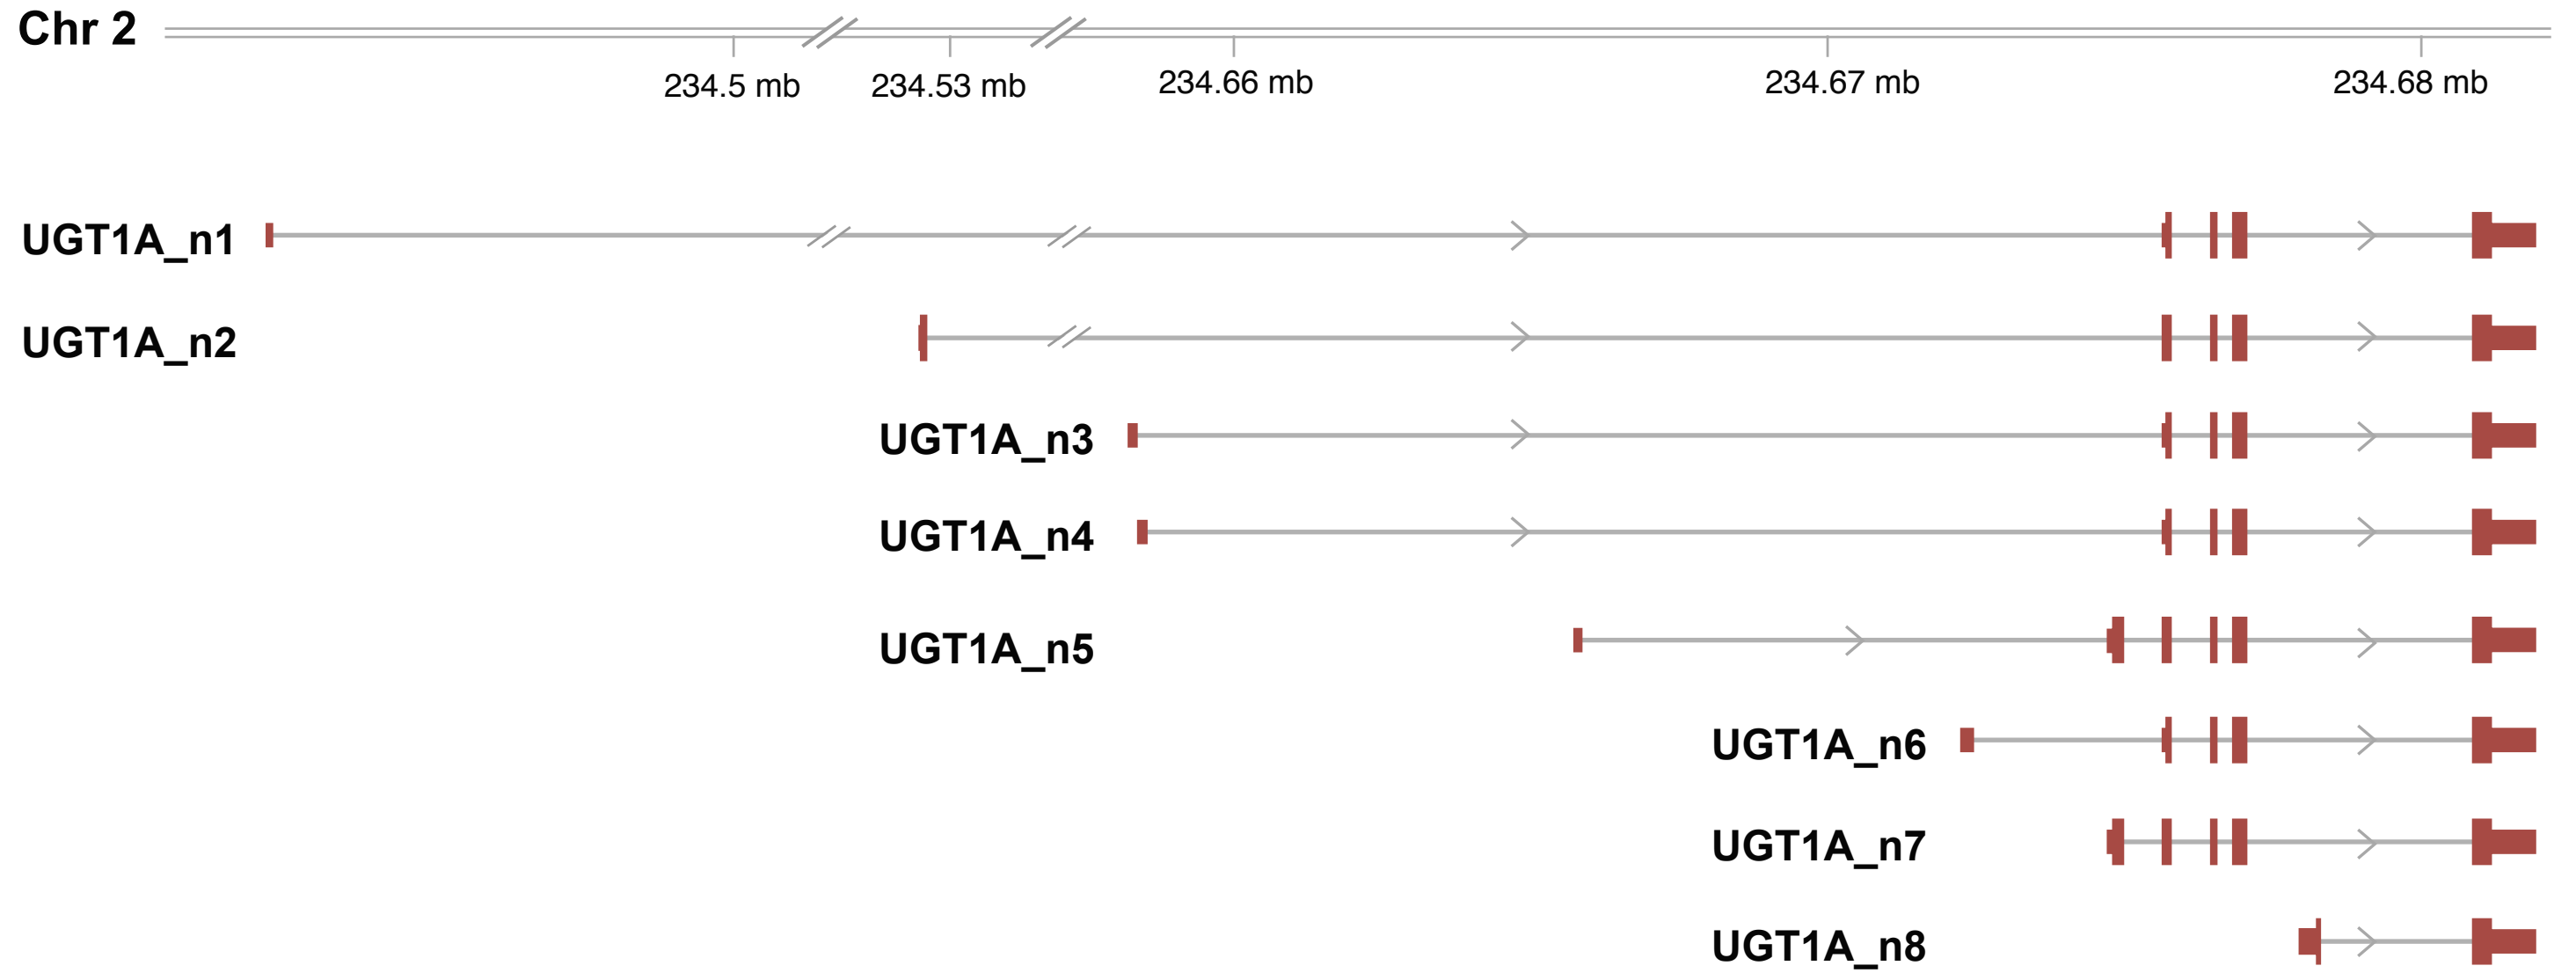**Legend**

- Classical transcripts (v)
- Published alternative transcripts (v)
- Novel putative transcripts (n)
- Splicing (Intron)
- > Transcriptional orientation
- or ■ Untranslated Region (UTR)
- Open Reading Frame (ORF)
