# Supplementary material
Source: PubMed Central journal article supplement (PMC6174029)
Supplement: NIHMS989496-supplement-Figure_S2.pdf [file NIHMS989496-supplement-Figure_S2.pdf]

# UGT2B4

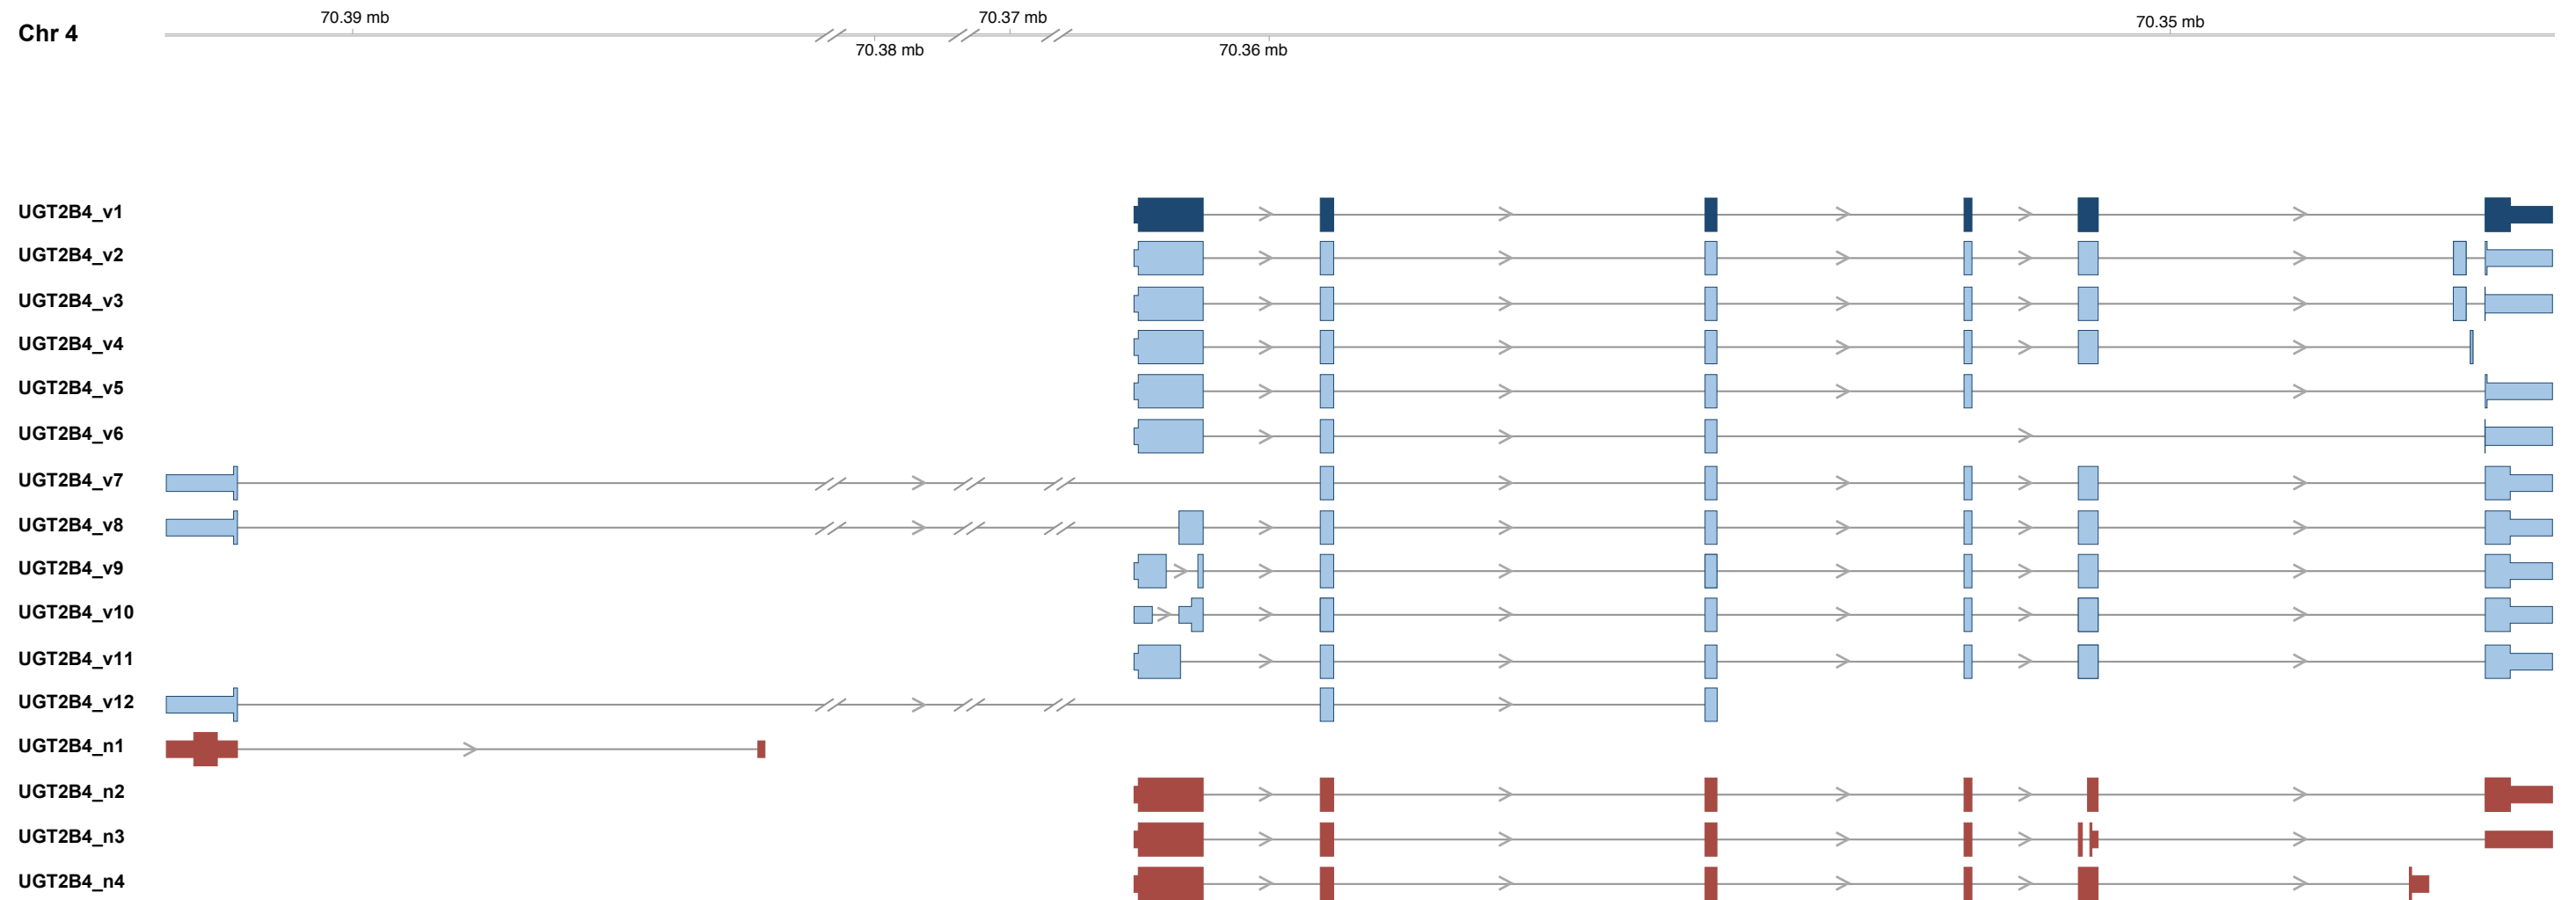

**Legend**

- Classical transcripts (v)
- Published alternative transcripts (v)
- Novel putative transcripts (n)
- Splicing (Intron)
- > Transcriptional orientation
- or ■ Untranslated Region (UTR)
- Open Reading Frame (ORF)

S2b

# UGT2B7

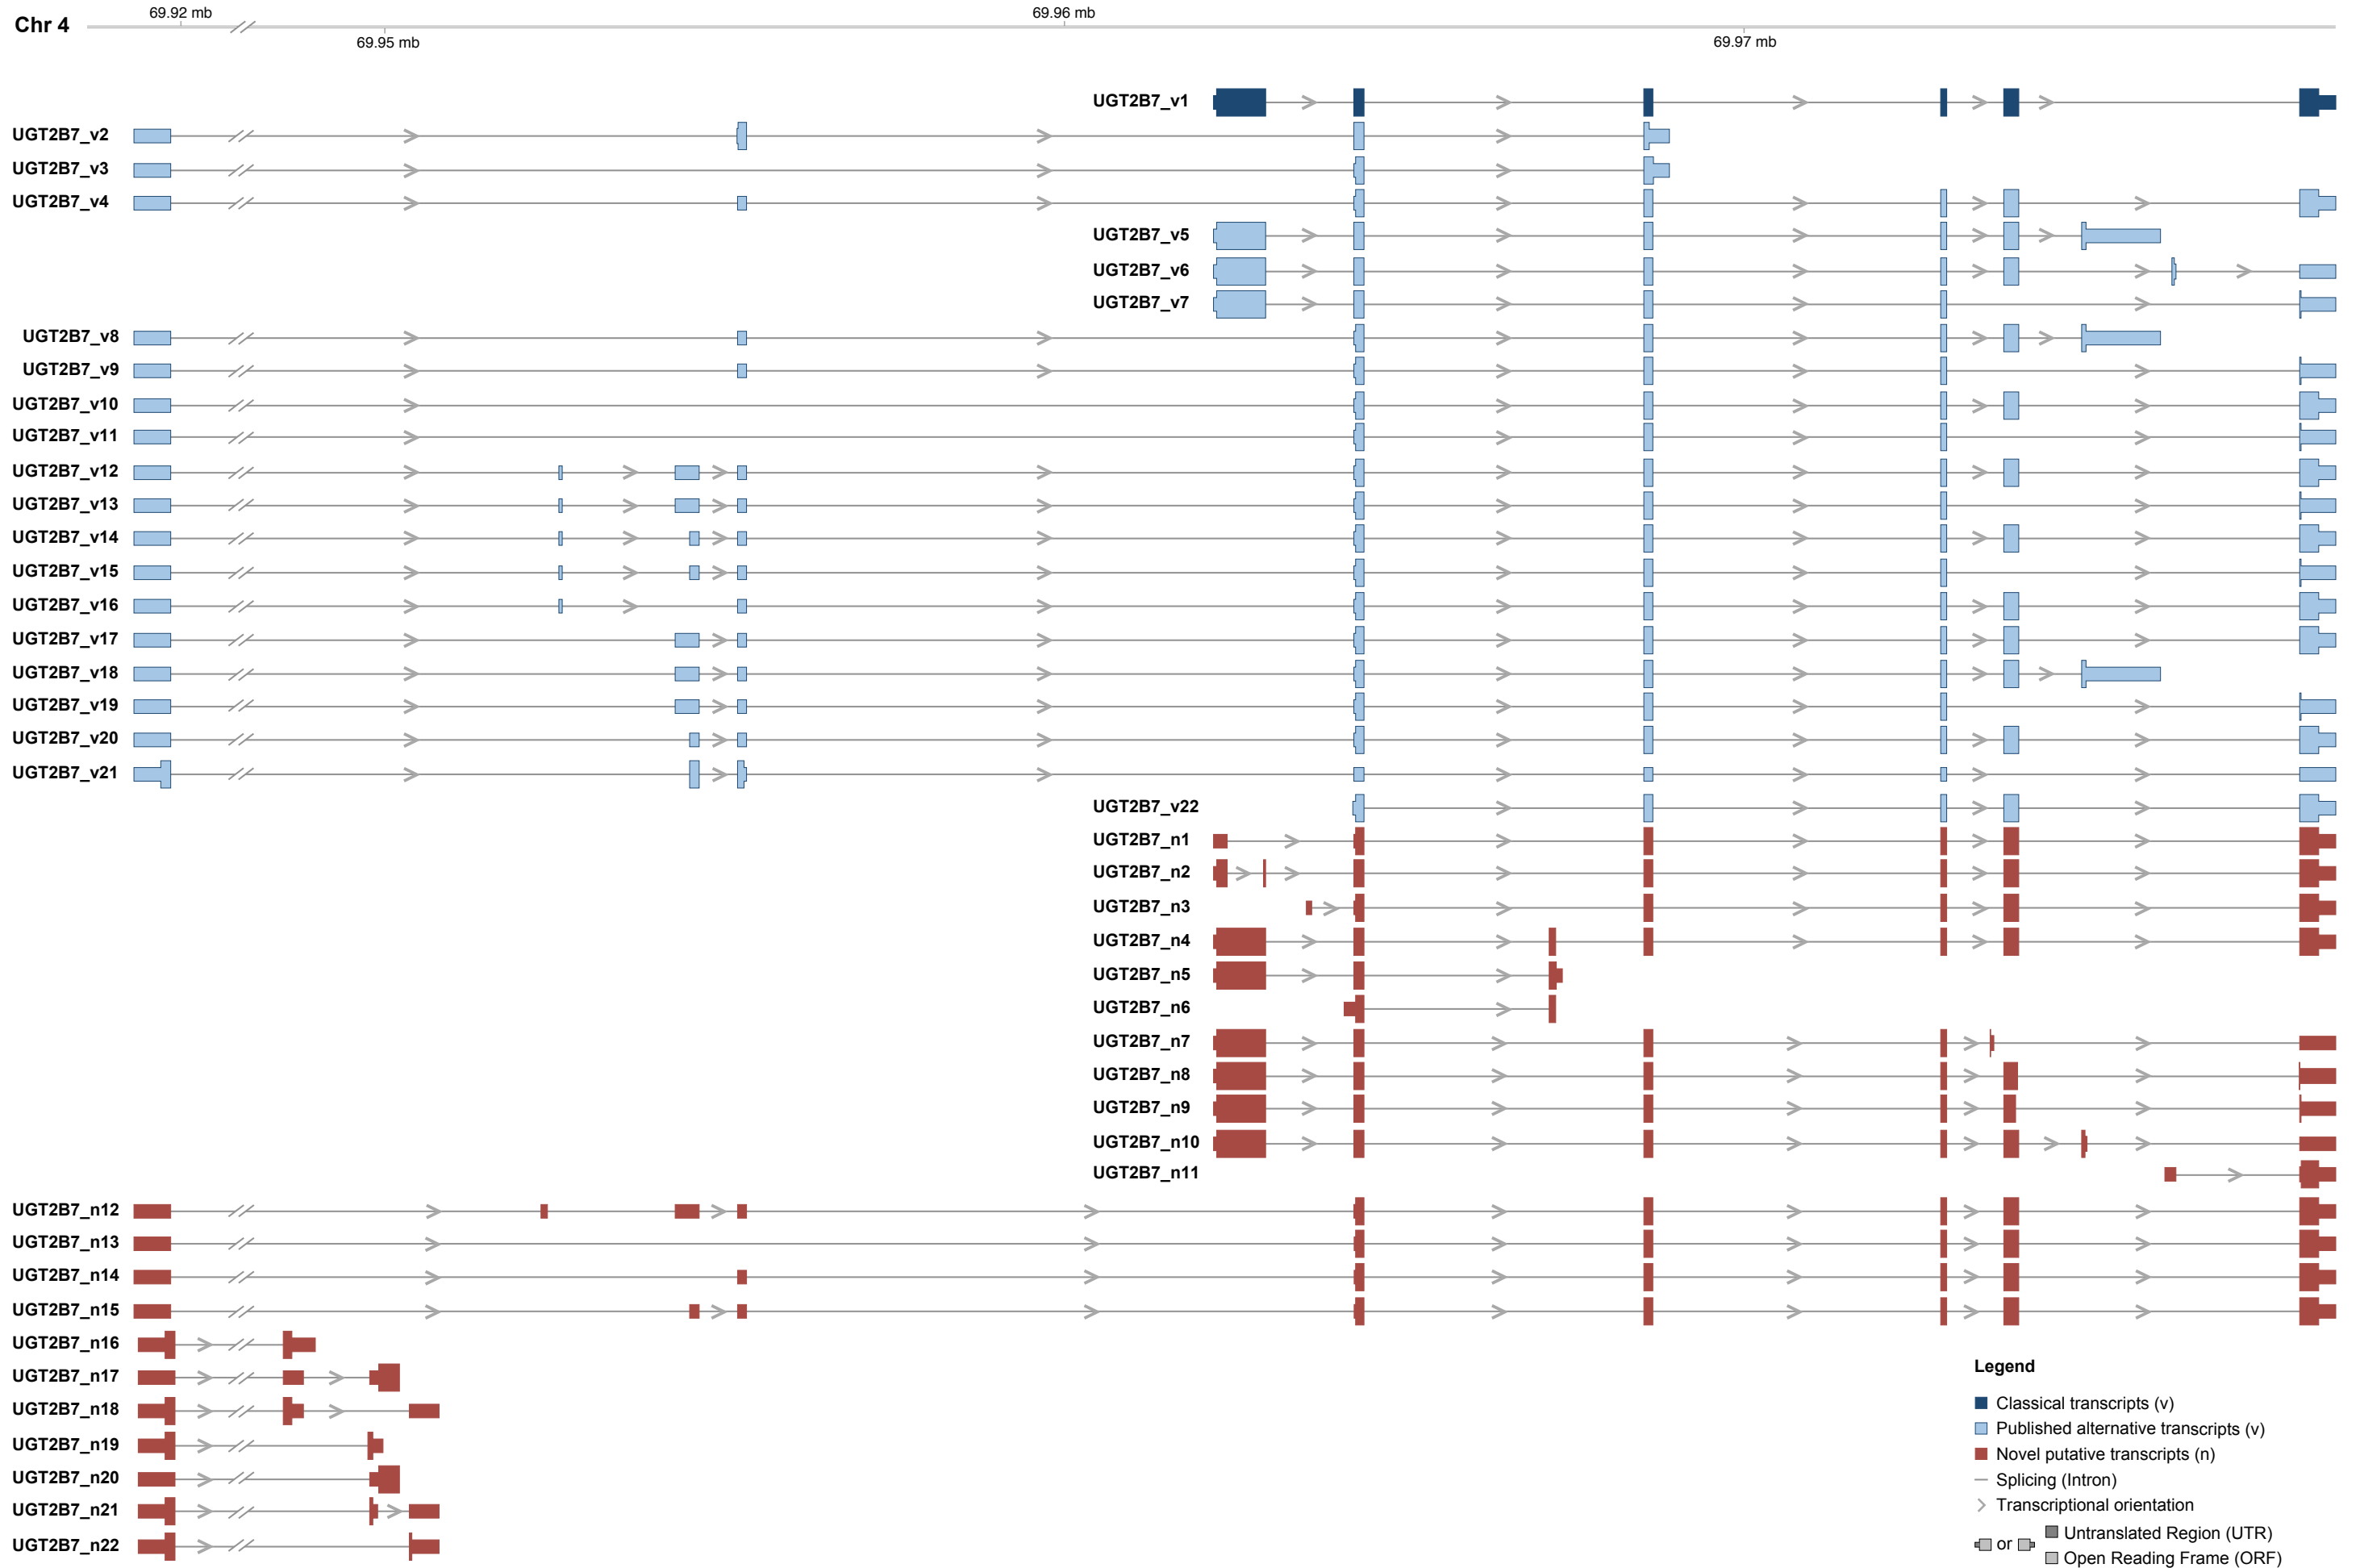

*UGT2B10*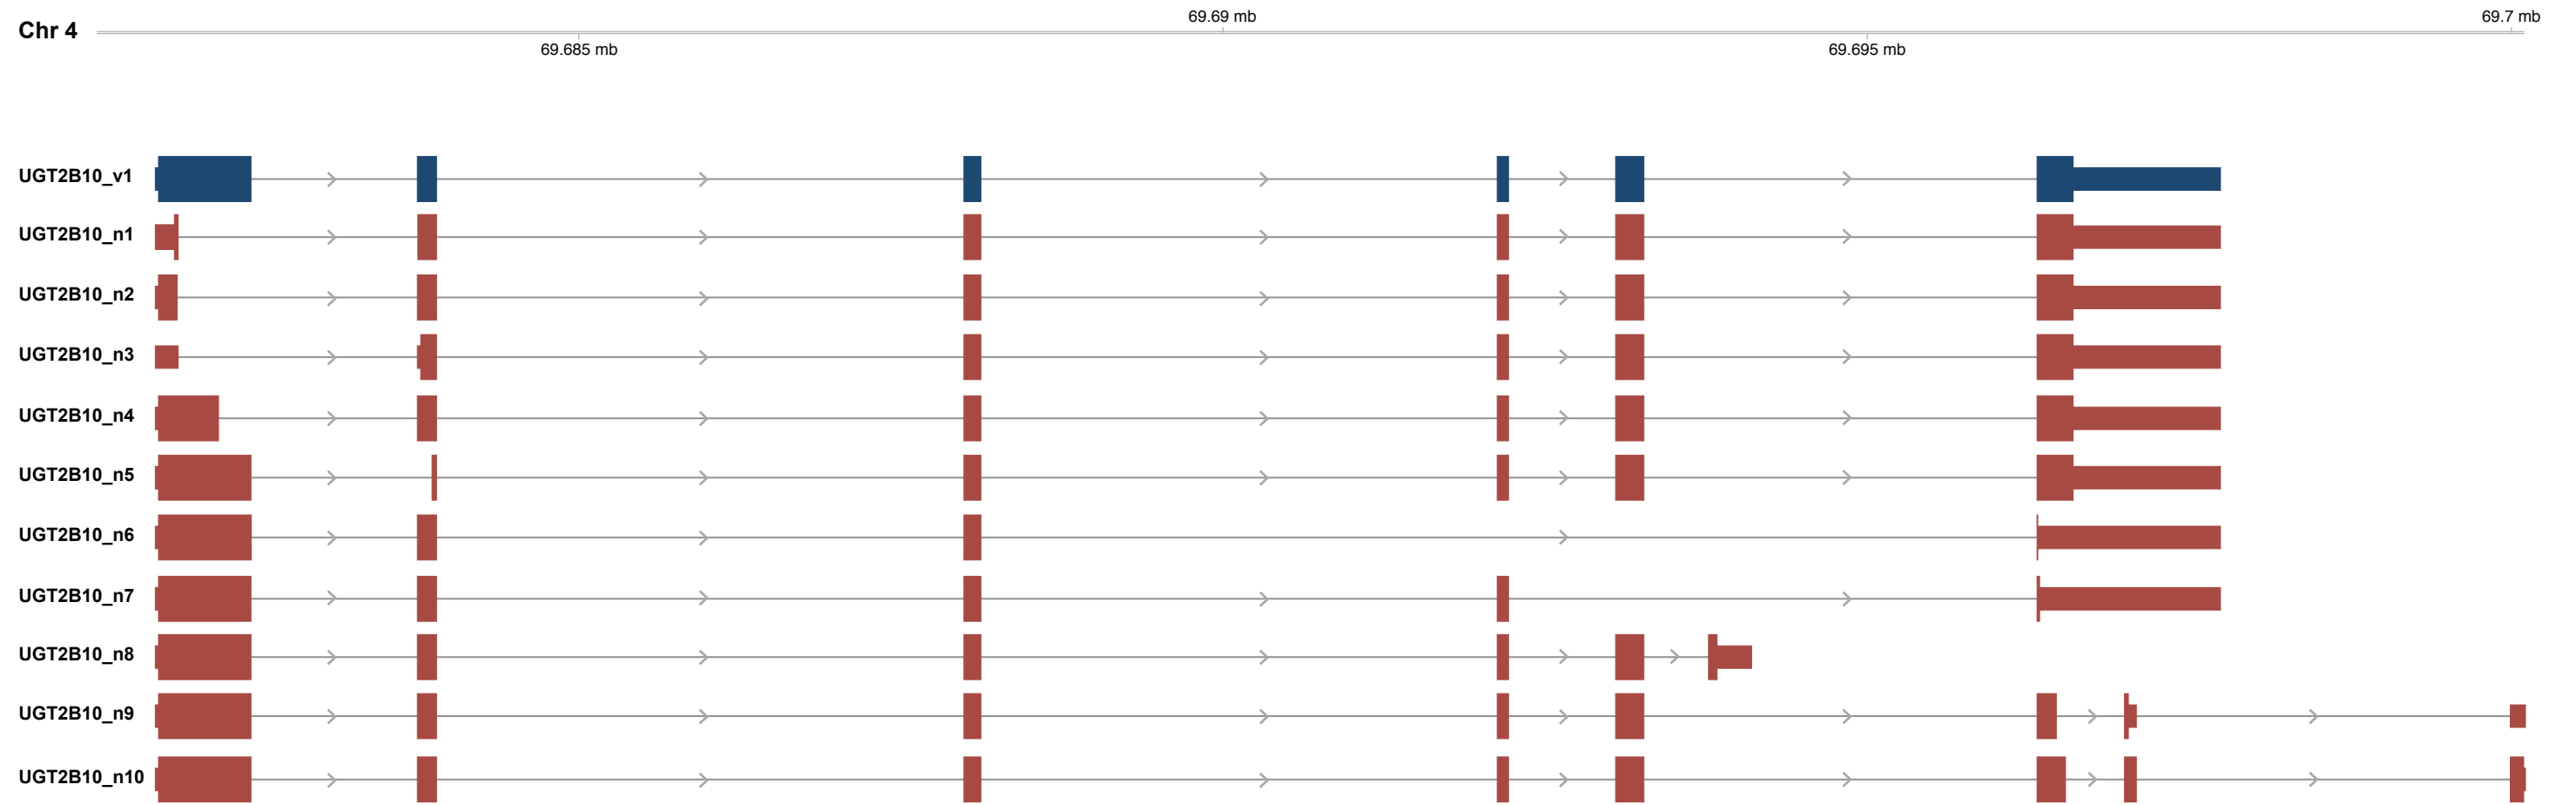

## Legend

- Classical transcripts (v)
- Published alternative transcripts (v)
- Novel putative transcripts (n)
- Splicing (Intron)
- > Transcriptional orientation
- or ■ Untranslated Region (UTR)
- or ■ Open Reading Frame (ORF)

# UGT2B11

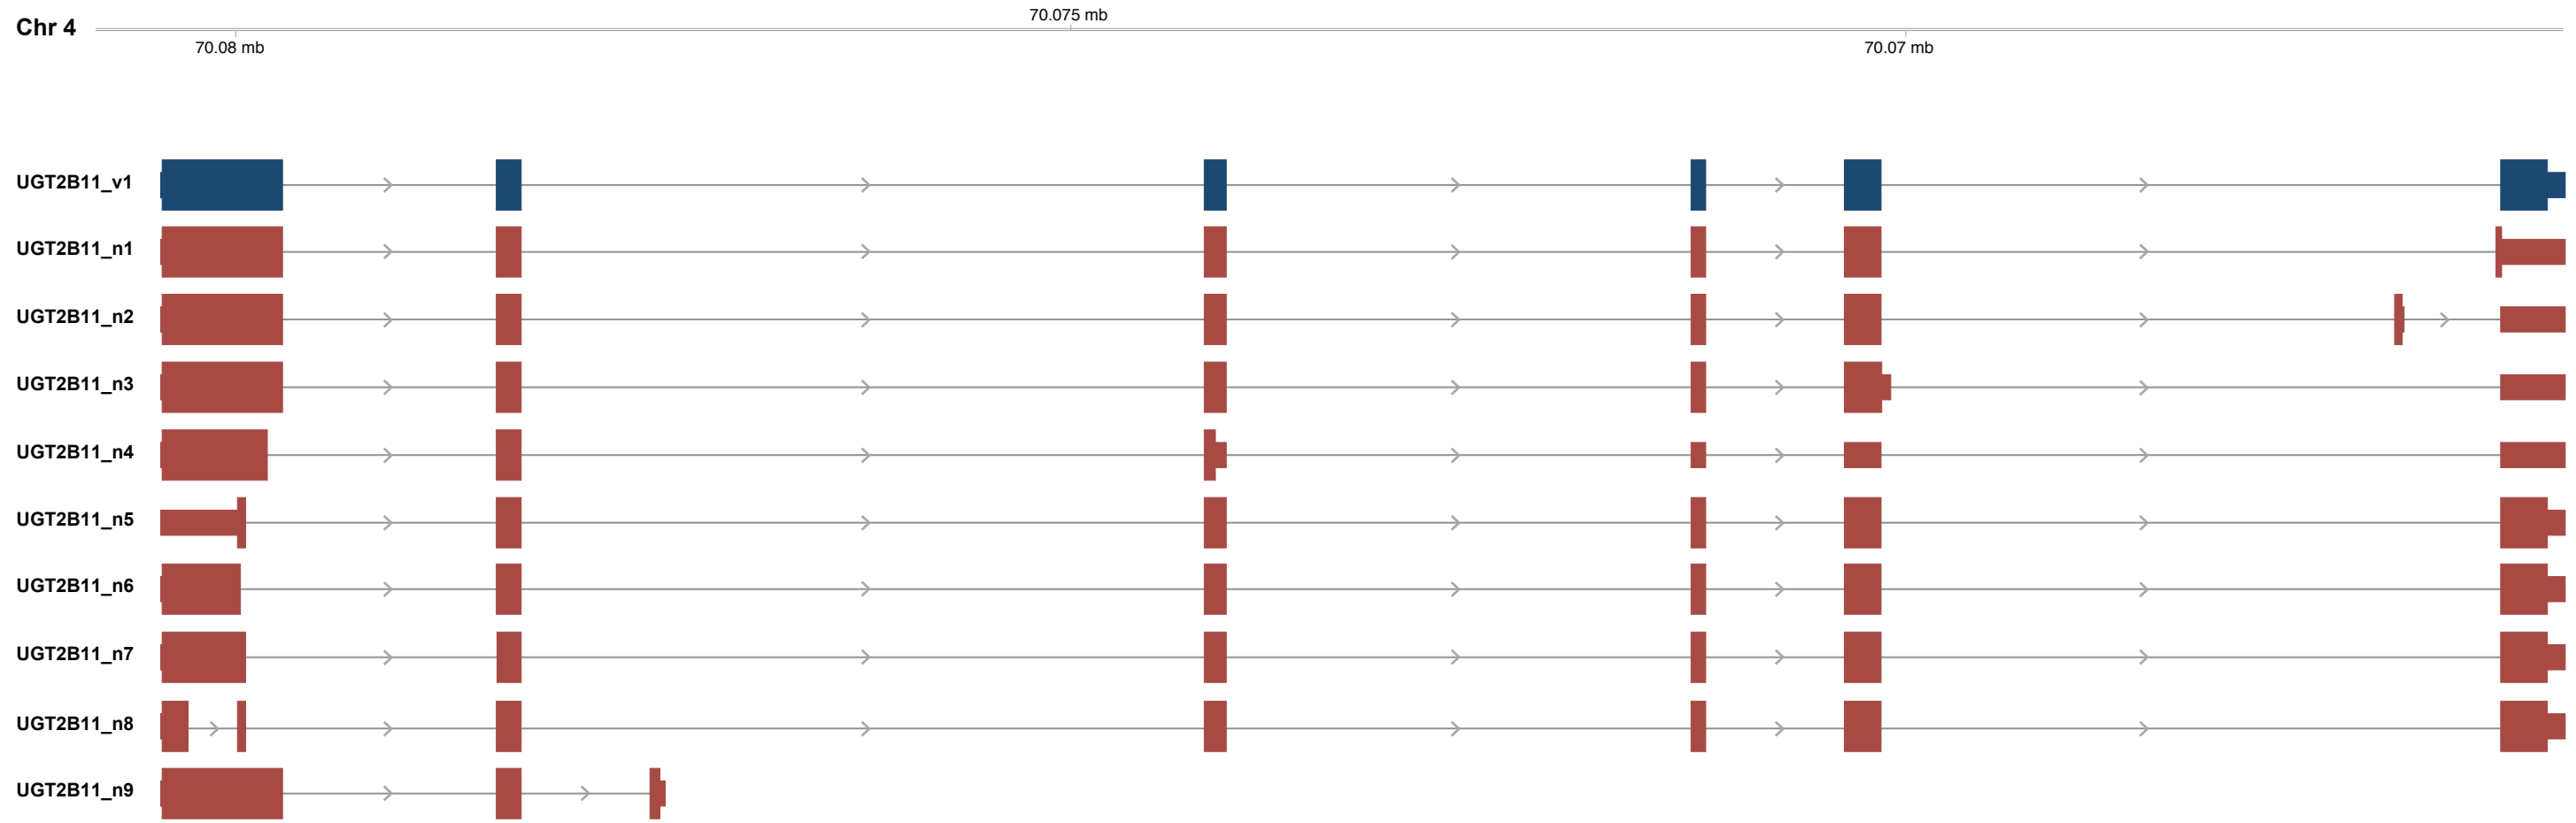

**Legend**

- Classical transcripts (v)
- Published alternative transcripts (v)
- Novel putative transcripts (n)
- Splicing (Intron)
- > Transcriptional orientation
- or ■ Untranslated Region (UTR)
- Open Reading Frame (ORF)

**UGT2B15**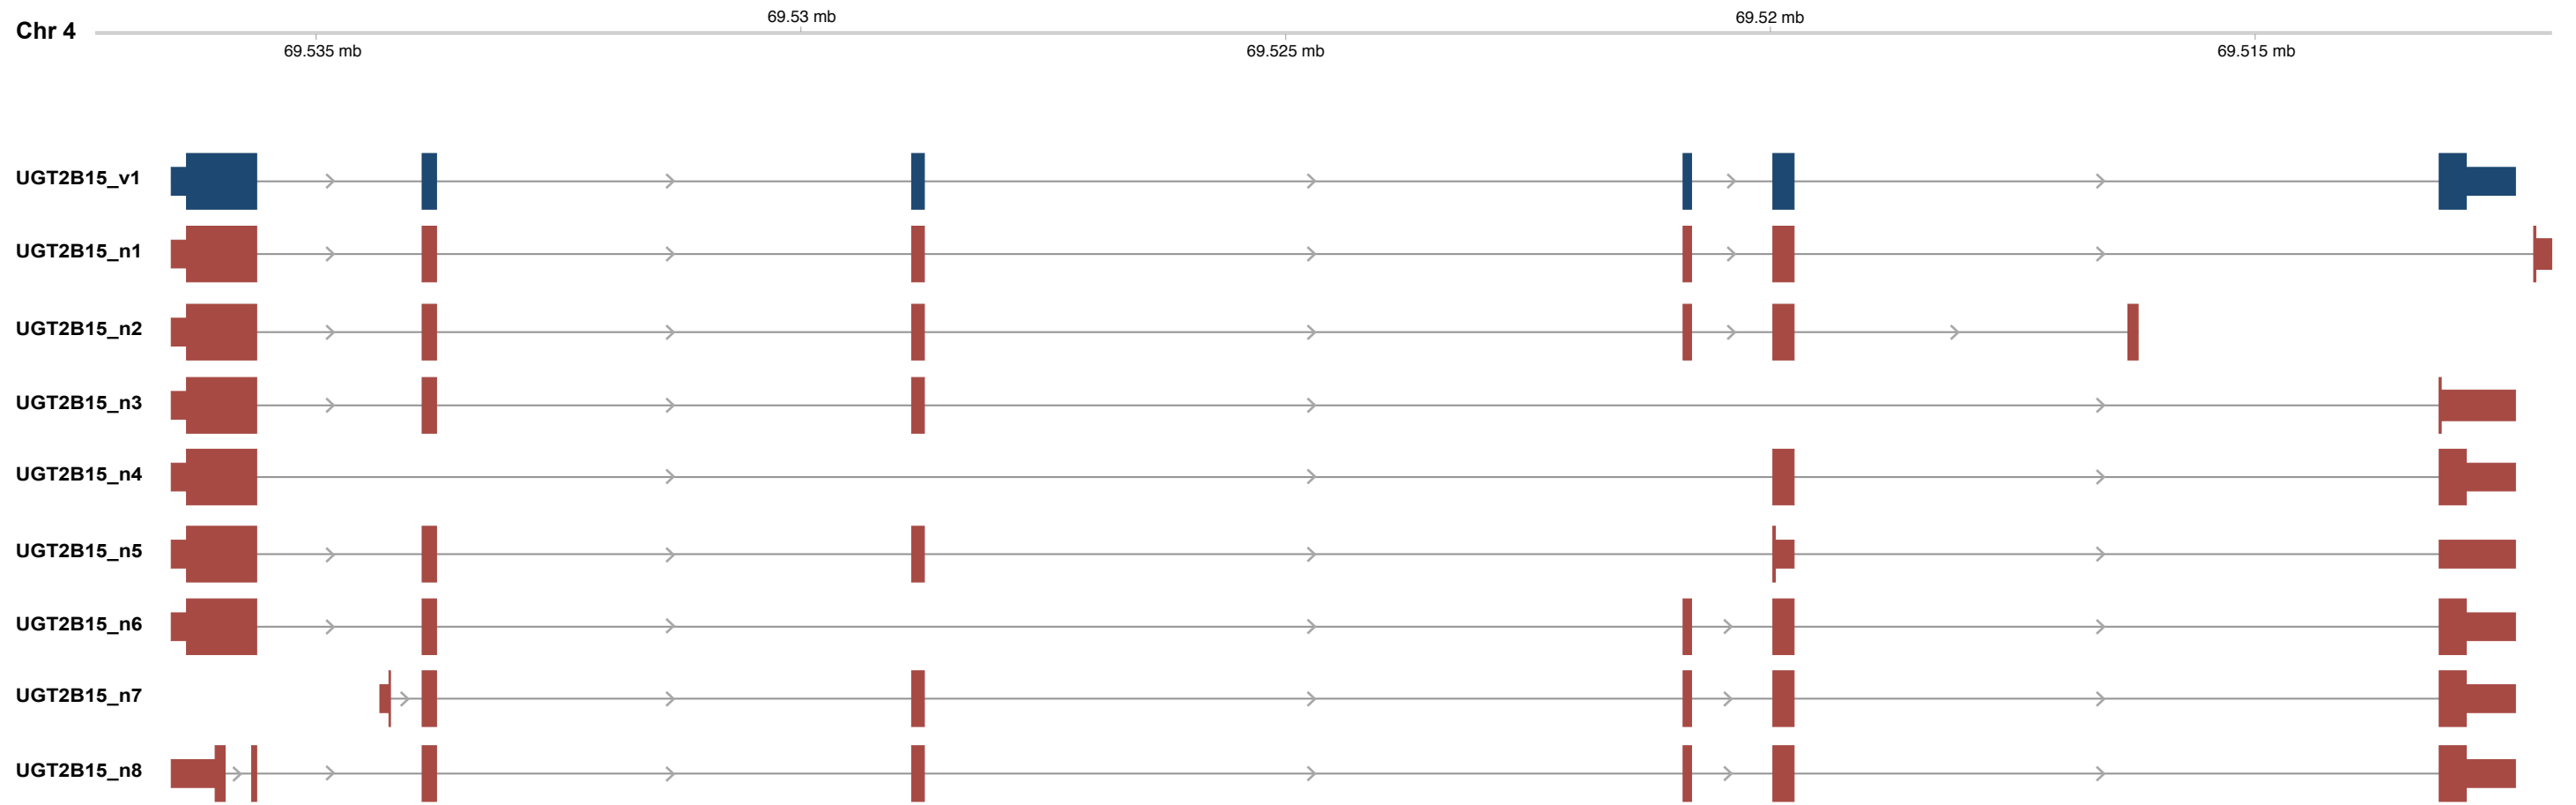**Legend**

- Classical transcripts (v)
- Published alternative transcripts (v)
- Novel putative transcripts (n)
- Splicing (Intron)
- > Transcriptional orientation
- or ■ Untranslated Region (UTR)
- or ■ Open Reading Frame (ORF)

**UGT2B17**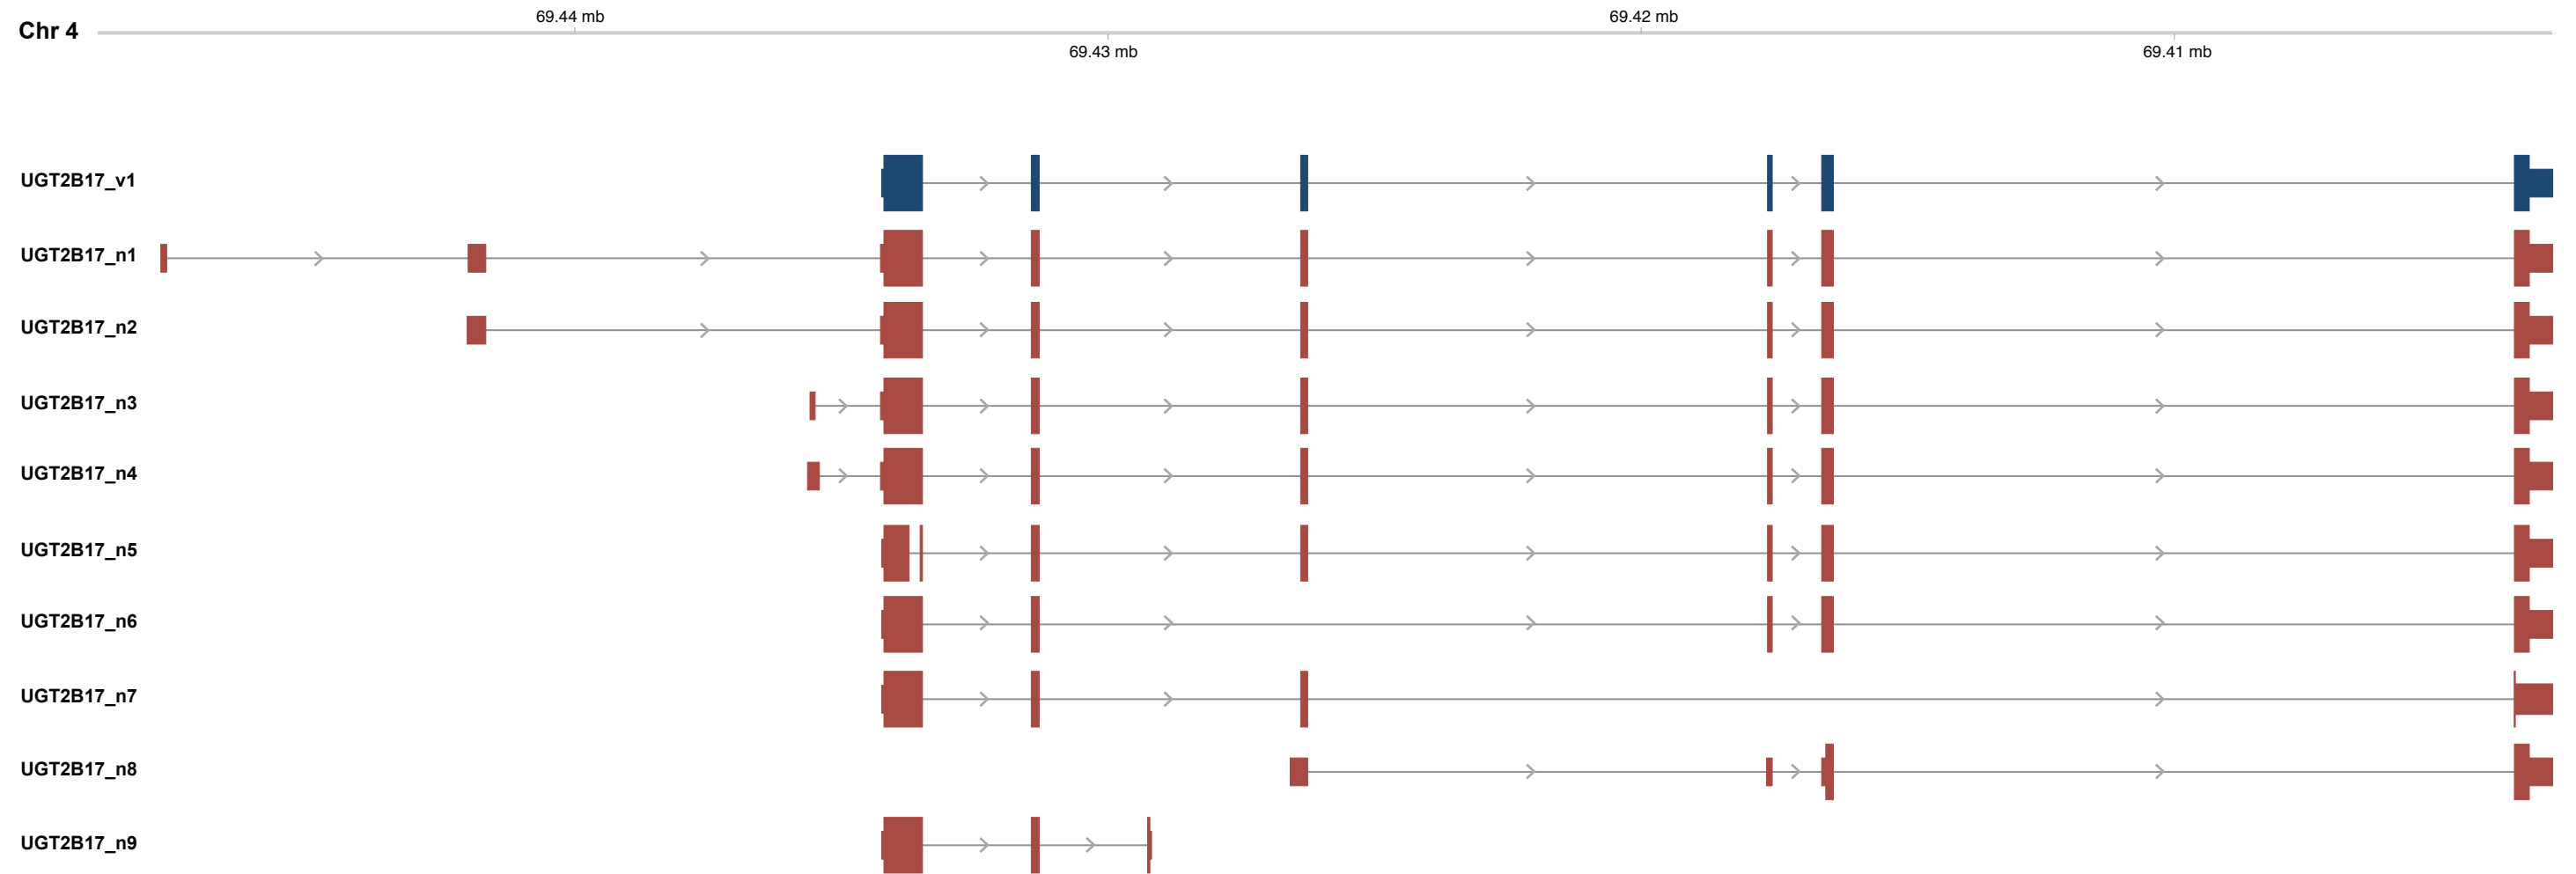**Legend**

- Classical transcripts (v)
- Published alternative transcripts (v)
- Novel putative transcripts (n)
- Splicing (Intron)
- > Transcriptional orientation
- or ■ Untranslated Region (UTR)
- Open Reading Frame (ORF)

**UGT2B28**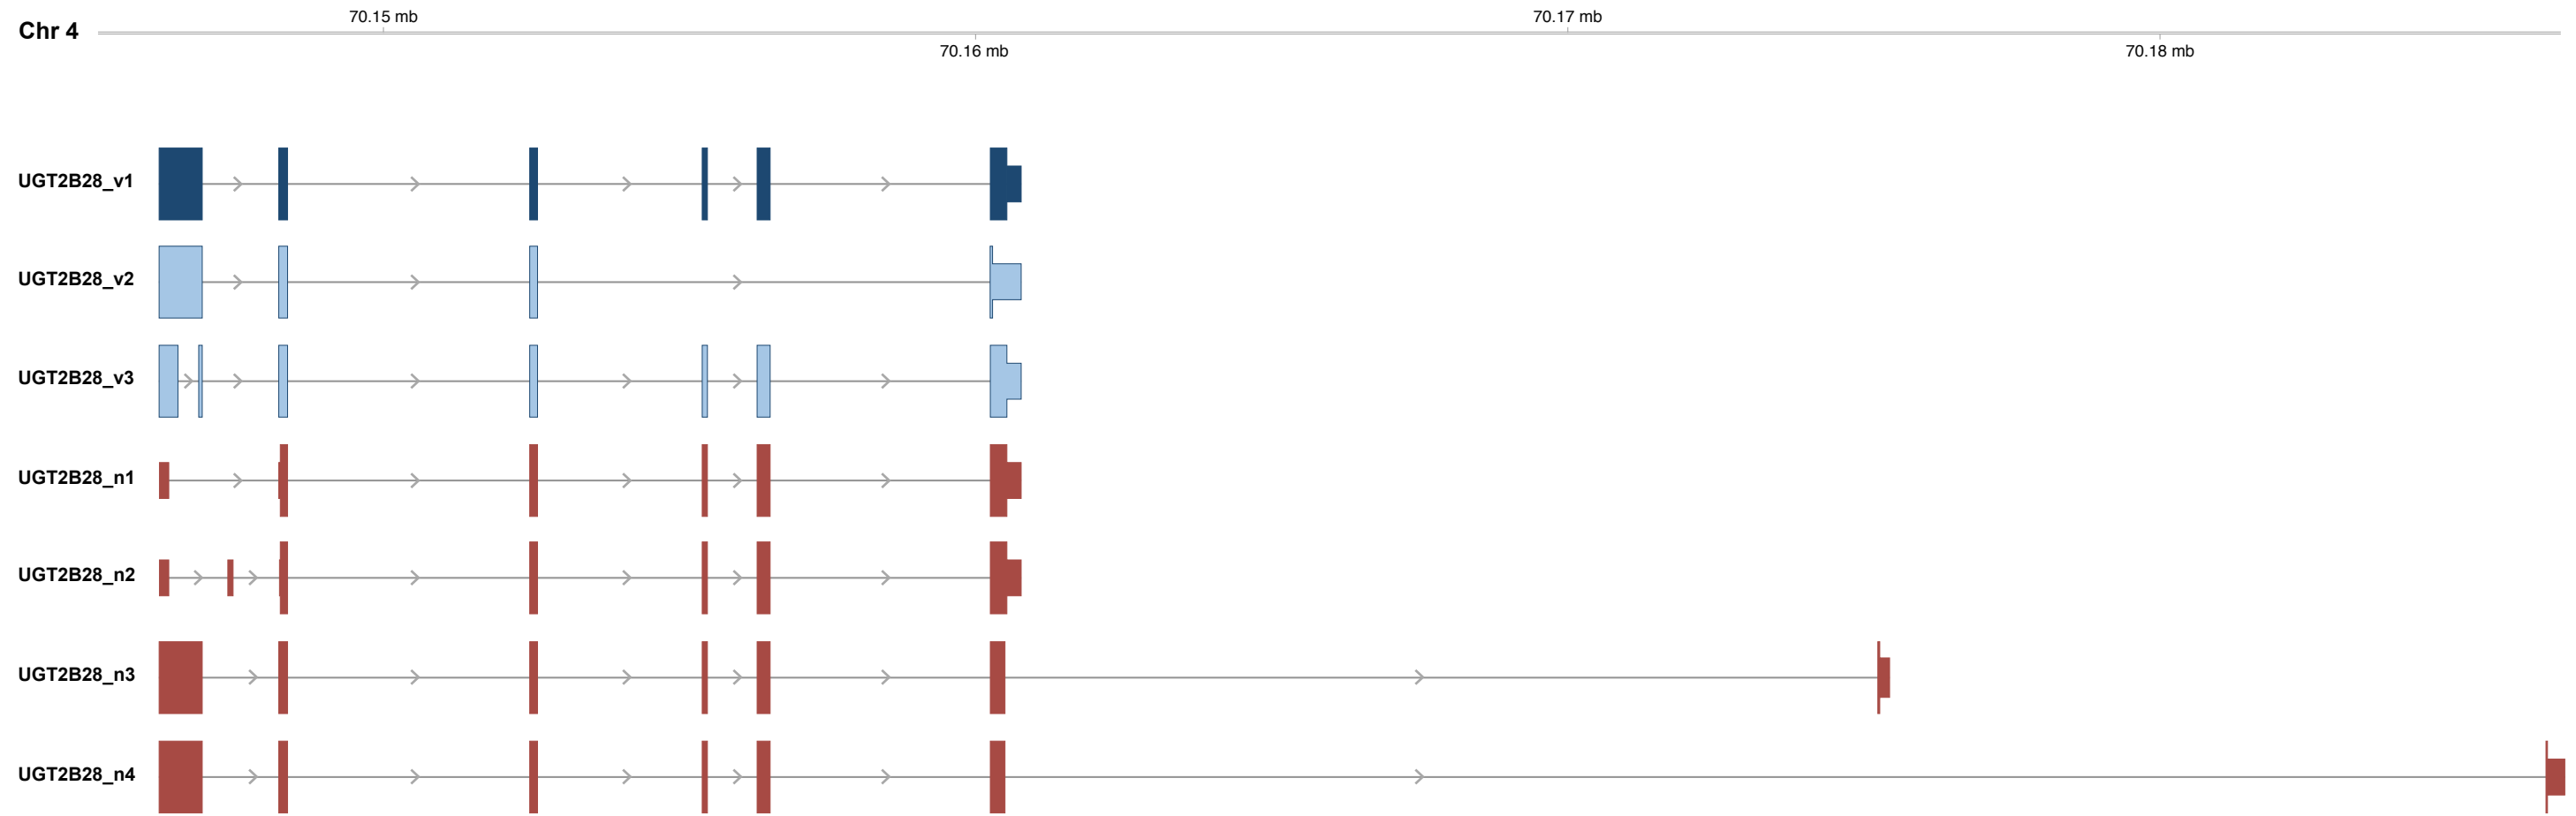**Legend**

- Classical transcripts (v)
- Published alternative transcripts (v)
- Novel putative transcripts (n)
- Splicing (Intron)
- > Transcriptional orientation
- Untranslated Region (UTR)
- or ■ Open Reading Frame (ORF)

**UGT2A1-2A2**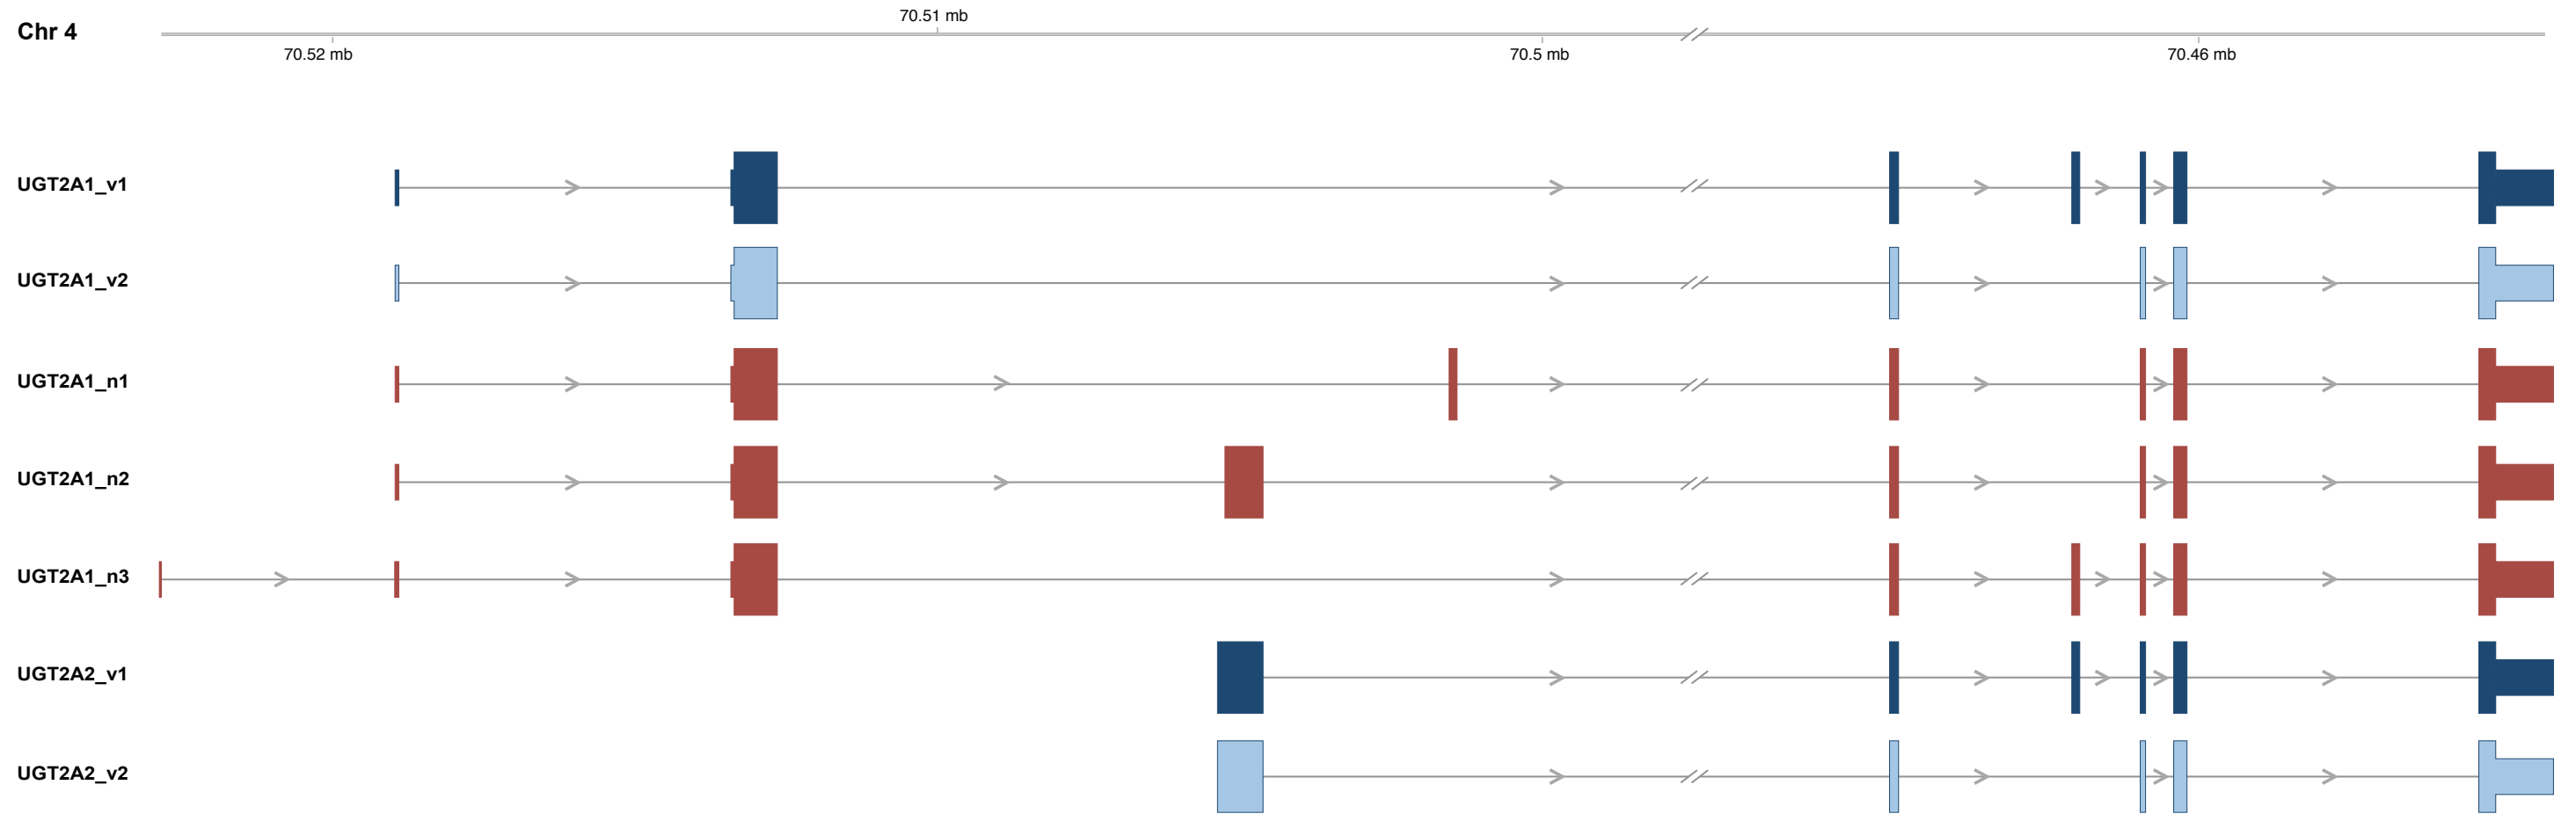**Legend**

- Classical transcripts (v)
- Published alternative transcripts (v)
- Novel putative transcripts (n)
- Splicing (Intron)
- > Transcriptional orientation
- Untranslated Region (UTR)
- or ■ Open Reading Frame (ORF)



**UGT2A3**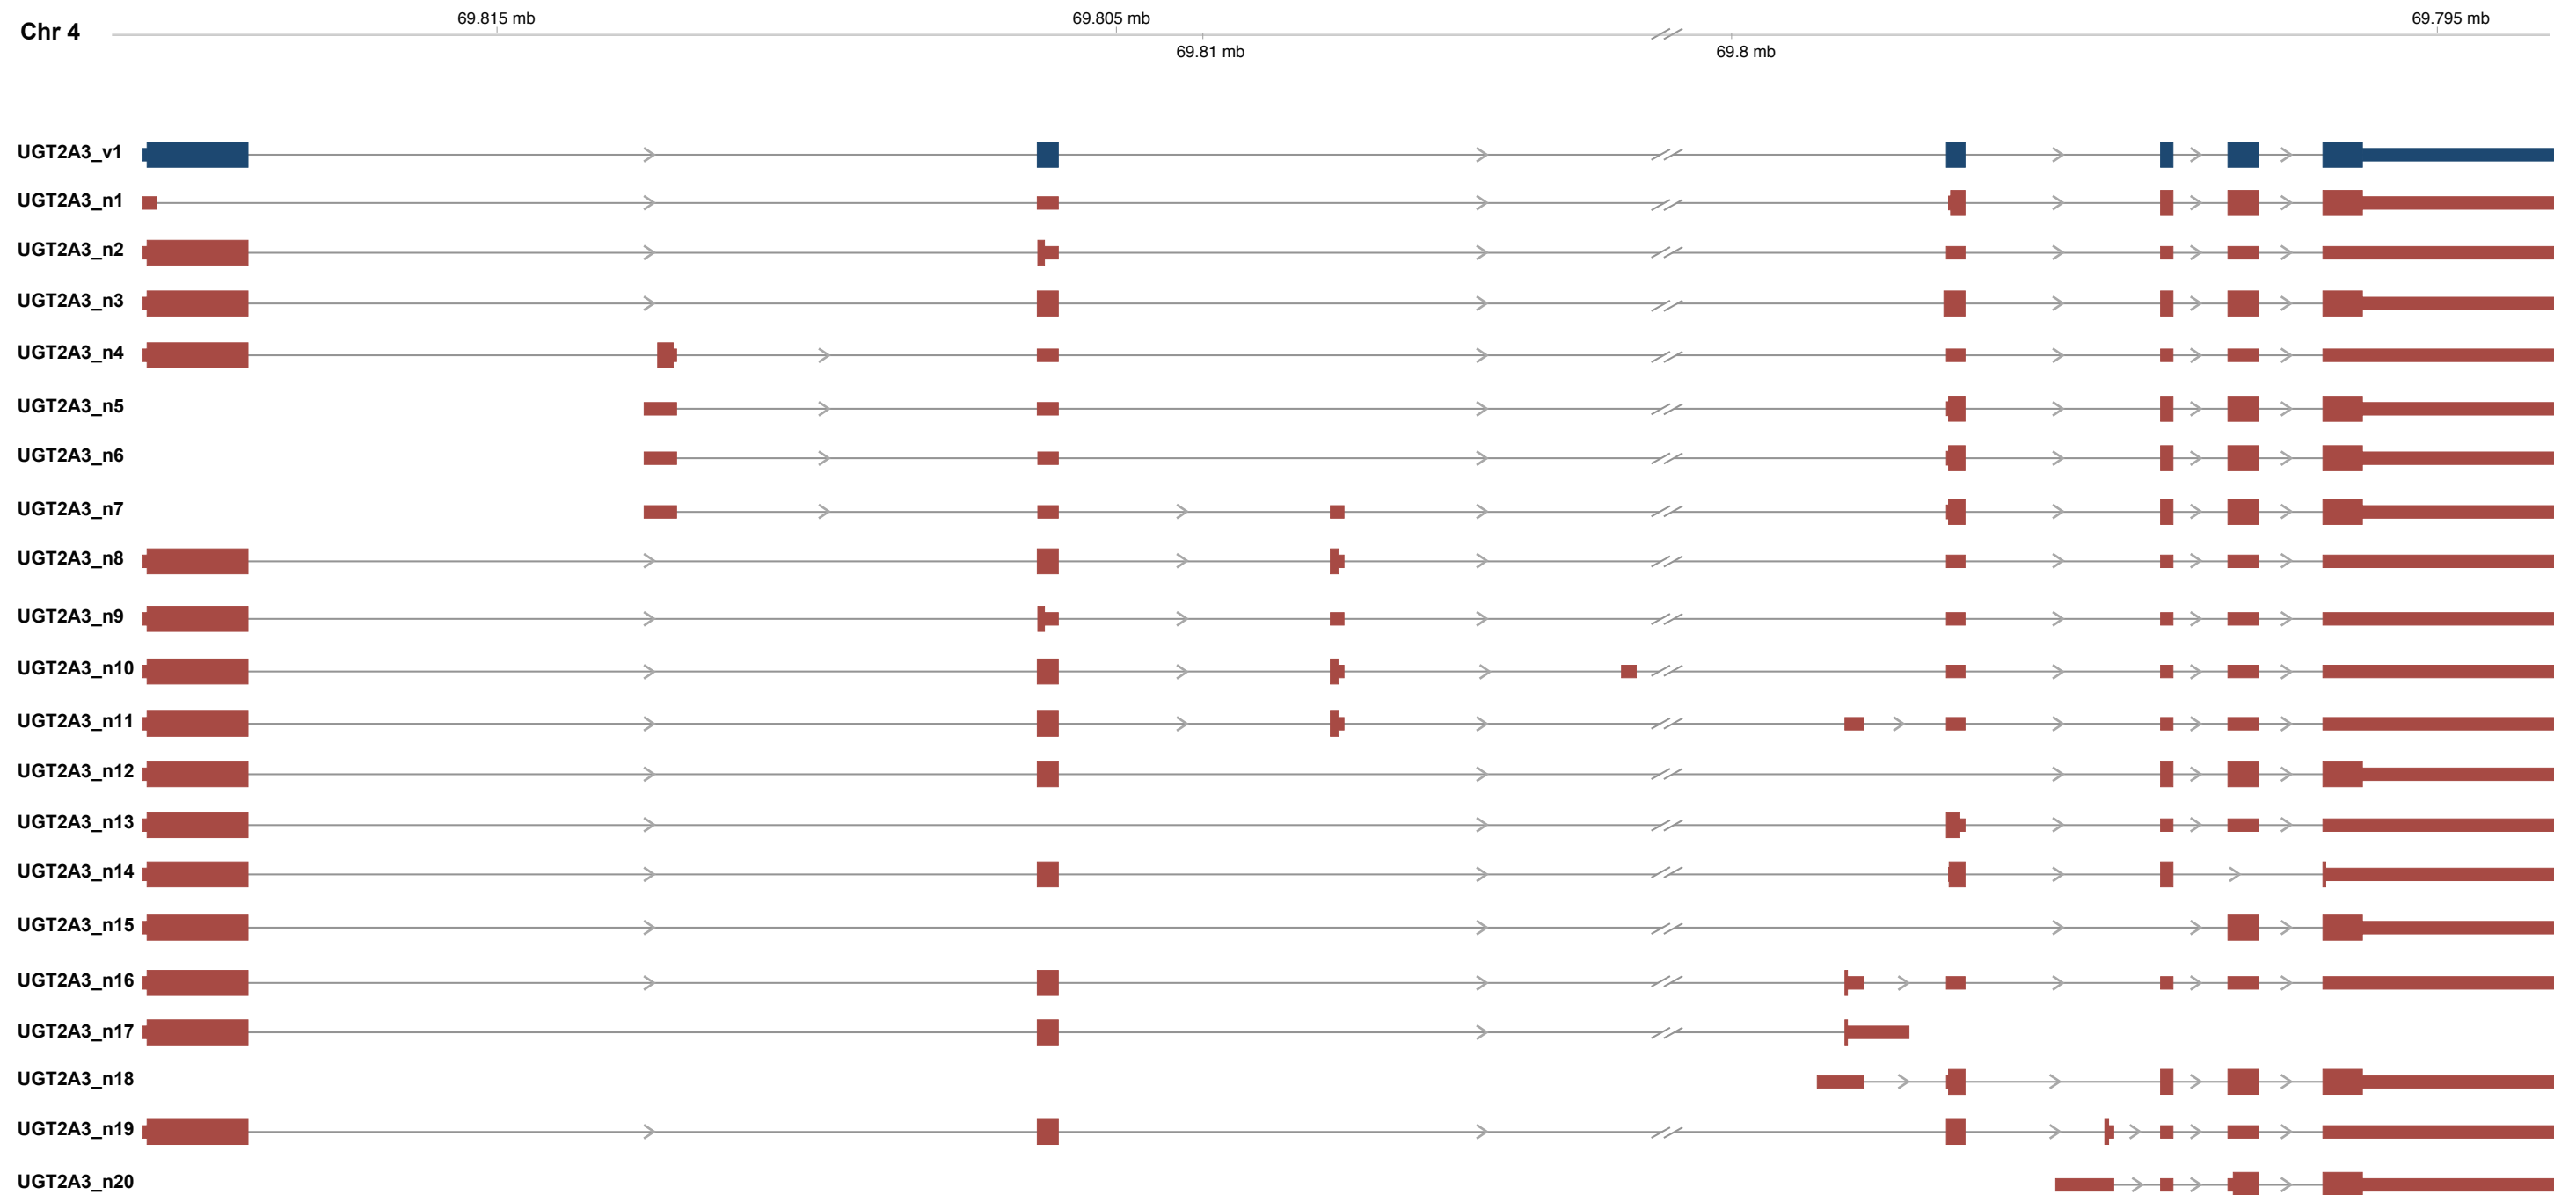**Legend**

- Classical transcripts (v)
- Published alternative transcripts (v)
- Novel putative transcripts (n)
- Splicing (Intron)
- > Transcriptional orientation
- or ■ Untranslated Region (UTR)
- or ■ Open Reading Frame (ORF)
