# Supplementary material
Source: PubMed Central journal article supplement (PMC6174029)
Supplement: NIHMS989496-supplement-Table_S1.pdf [file NIHMS989496-supplement-Table_S1.pdf]

Table S1: PCR primer sequences used for the validation of novel UGT variants

| <b>UGT</b>          | <b>Primer</b> | <b>Sequence</b>                   | <b>Annealing Temperature</b> |
|---------------------|---------------|-----------------------------------|------------------------------|
| <i>UGT1A1_Δex2</i>  | p1            | TTCACAGAACTTTCTGTGCGACGTGGTTTA    | 60°C and 55°C                |
|                     | p2            | CAGTGTACCGCCACAGGACCTGGGATAGTGA   |                              |
| <i>UGT2B17_Δex3</i> | p3            | CTACTTAACATACCCTTTCTGTACAGTCTCCGC | 60°C                         |
|                     | p4            | CTTTATTTTGACTTTTGGTTTCAAGC        |                              |
|                     | p5            | CAAATCTCCATAGAACCTTAGGCAA         |                              |
|                     | p6            | ATAATTTTCATGATATTCTCTTTATAGAT     |                              |
| <i>UGT2B7_ex2b</i>  | p7            | AGTACAGGAAATCATGTCAAT             | 60°C                         |
|                     | p8            | GCTTGATGCCCAGAGCCTTAT             |                              |
